# Supplementary material for: Clinical remission in severe asthma with biologic therapy: an analysis from the UK Severe Asthma Registry
Source: PubMed Central journal article supplement (PMC10719453; doi:10.1183/13993003.00819-2023), 2023-12-14

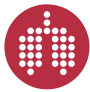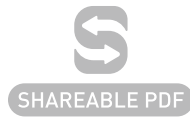

# Clinical remission in severe asthma with biologic therapy: an analysis from the UK Severe Asthma Registry

P. Jane McDowell<sup>1,2</sup>, Ron McDowell<sup>3</sup>, John Busby<sup>3</sup>, M. Chad Eastwood<sup>1,2</sup>, Pujan H. Patel<sup>4</sup>, David J. Jackson<sup>5</sup>, Adel Mansur<sup>6</sup>, Mitesh Patel<sup>7</sup>, Hassan Burhan<sup>8</sup>, Simon Doe<sup>9</sup>, Rekha Chaudhuri<sup>10</sup>, Robin Gore<sup>11</sup>, James W. Dodd<sup>12</sup>, Deepak Subramanian<sup>13</sup>, Thomas Brown<sup>14</sup> and Liam G. Heaney<sup>1,2</sup> on behalf of the UK Severe Asthma Registry

<sup>1</sup>Wellcome Wolfson Centre for Experimental Medicine, School of Medicine, Dentistry and Biomedical Sciences, Queen's University, Belfast, UK. <sup>2</sup>Belfast Health and Social Care NHS Trust, Belfast, UK. <sup>3</sup>Centre for Public Health, School of Medicine, Dentistry and Biomedical Sciences, Queen's University, Belfast, UK. <sup>4</sup>Royal Brompton and Harefield Hospitals, London, UK. <sup>5</sup>Guy's Severe Asthma Centre, Guy's Hospital, School of Immunology and Microbial Sciences, King's College London, London, UK. <sup>6</sup>University of Birmingham and Heartlands Hospital, Birmingham, UK. <sup>7</sup>Department of Respiratory Medicine, University Hospitals Plymouth NHS Trust, Derriford Hospital, Plymouth, UK. <sup>8</sup>Royal Liverpool University Hospital, Liverpool, UK. <sup>9</sup>The Newcastle upon Tyne Hospitals NHS Foundation Trust, Newcastle upon Tyne, UK. <sup>10</sup>NHS Greater Glasgow and Clyde Health Board, Gartnavel Hospital, Glasgow, UK. <sup>11</sup>Addenbrooke's Hospital, Cambridge University Hospitals NHS Foundation Trust, Cambridge, UK. <sup>12</sup>Academic Respiratory Unit, University of Bristol, Bristol, UK. <sup>13</sup>University Hospitals of Derby and Burton NHS Foundation Trust, Derby, UK. <sup>14</sup>Portsmouth Hospitals NHS Trust, Portsmouth, UK.

Corresponding author: P. Jane McDowell ([janemcdowell@doctors.org.uk](mailto:janemcdowell@doctors.org.uk))

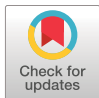

Shareable abstract (@ERSpublications)

**Analysis of a real-world severe asthma registry shows clinical remission rates of 18%; associated pre-biologic characteristics include male sex, never smoking, BMI <30 kg·m<sup>-2</sup>, shorter disease duration, T2-high biomarkers and lower symptom burden** <https://bit.ly/46JLeDb>

**Cite this article as:** McDowell PJ, McDowell R, Busby J, *et al.* Clinical remission in severe asthma with biologic therapy: an analysis from the UK Severe Asthma Registry. *Eur Respir J* 2023; 62: 2300819 [DOI: 10.1183/13993003.00819-2023].

This extracted version can be shared freely online.

## Abstract

**Background** Novel biologic therapies have revolutionised the management of severe asthma with more ambitious treatment aims. Here we analyse the definition of clinical remission as a suggested treatment goal and consider the characteristics associated with clinical remission in a large, real-world severe asthma cohort.

**Methods** This was a retrospective analysis of severe asthma patients registered in the UK Severe Asthma Registry (UKSAR) who met strict national access criteria for biologics. Patients had a pre-biologics baseline assessment and annual review. The primary definition of clinical remission applied included Asthma Control Questionnaire (ACQ)-5 <1.5 and no oral corticosteroids for disease control and forced expiratory volume in 1 s above lower limit of normal or no more than 100 mL less than baseline.

**Results** 18.3% of patients achieved the primary definition of remission. The adjusted odds of remission on biologic therapy were 7.44 (95% CI 1.73–31.95)-fold higher in patients with type 2 (T2)-high biomarkers. The adjusted odds of remission were lower in patients who were female (OR 0.61, 95% CI 0.45–0.93), obese (OR 0.49, 95% CI 0.24–0.65) or had ACQ-5 ≥1.5 (OR 0.19, 95% CI 0.12–0.31) pre-biologic therapy. The likelihood of remission reduced by 14% (95% CI 0.76–0.97) for every 10-year increase in disease duration. 12–21% of the cohort attained clinical remission depending on the definition applied; most of those who did not achieve remission failed to meet multiple criteria.

**Conclusions** 18.3% of patients achieved the primary definition of clinical remission. Remission was more likely in T2-high biomarker patients with shorter duration of disease and less comorbidity. Further research on the optimum time to commence biologics in severe asthma is required.

Copyright ©The authors 2023.

This version is distributed under the terms of the Creative Commons Attribution Licence 4.0.

This article has an editorial commentary:  
<https://doi.org/10.1183/13993003.01844-2023>

Received: 16 May 2023  
Accepted: 5 Oct 2023

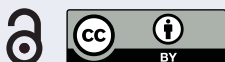

Supplement: ERJ-00819-2023.Shareable.pdf [file ERJ-00819-2023.Shareable.pdf]
