# Supplementary material for: Clinical remission in severe asthma with biologic therapy: an analysis from the UK Severe Asthma Registry
Source: PubMed Central journal article supplement (PMC10719453; doi:10.1183/13993003.00819-2023), 2023-12-14
Supplement: ERJ-00819-2023.Supplement.pdf [file ERJ-00819-2023.Supplement.pdf]

# Clinical remission in severe asthma with Biologic Therapy: an analysis from the UK Severe Asthma Registry: Online Supplement.

## Definitions of severe asthma (ATS/ERS and GINA) <sup>E1</sup>

### Definition of severe asthma: American Thoracic society/ European Respiratory Society

Severe asthma is defined as asthma which requires GINA step 4–5 asthma treatment (high dose inhaled corticosteroid (ICS) and long acting Beta-agonist (LABA) or leukotriene modifier/theophylline) and/or systemic corticosteroids (OCS) for 50% of the previous year to prevent it from becoming “uncontrolled” or which remains “uncontrolled” despite this therapy.

> Uncontrolled asthma is defined as at least one of the following:

1. Poor symptom control: Asthma Control Questionnaire (ACQ) consistently  $\geq 1.5$ , Asthma Control Test (ACT)  $< 20$  (or “not well controlled” by NAEPP/GINA guidelines)
2. Frequent severe exacerbations: two or more bursts of systemic OCS (3 days each) in the previous year
3. Serious exacerbations: at least one hospitalisation, ICU stay or mechanical ventilation in the previous year
4. Airflow limitation: after appropriate bronchodilator withhold FEV1 ,80% predicted (in the face of reduced FEV1/FVC defined as less than the lower limit of normal)

> Controlled asthma that worsens on tapering of these high doses of ICS or systemic OCS (or additional biologics)

### Definition of severe asthma: Global initiative for asthma (GINA) <sup>E2</sup>

Severe asthma is uncontrolled (poor symptom control,  $\geq 2$  exacerbations per year, requiring OCS,  $\geq 1$  severe exacerbation requiring hospitalisation) despite adherence factors with maximal optimized therapy and treatment of contributory factors, or that worsens when high dose treatment is decreased.

## Definitions of remission set forth by the ‘expert consensus framework for asthma remission as a treatment goal’ <sup>(E3)</sup>

### Clinical remission: on treatment

**$\geq 12$  months:**

- 1) Sustained absence of significant asthma symptoms using validated instrument AND
- 2) Optimisation and stabilization of lung function AND
- 3) Patient & HCP agreement regarding remission AND
- 4) No OCS for exacerbation or disease control

### Clinical remission: off treatment

Same criteria but without asthma treatment in  $\geq 12$  months

### Complete remission: on treatment

1. Meets definition for clinical remission AND
2. Current, objective evidence of the resolution of previous asthma-related inflammation\* AND
3. In appropriate research settings: current negative bronchial hyperresponsiveness

### Complete remission: off treatment

Same criteria but without asthma treatment in  $\geq 12$  months

**NICE criteria for commencing biologics in the UK for uncontrolled asthma despite optimisation and assessment of adherence:**

**Benralizumab:<sup>(E4)</sup>**

Benralizumab, as an add-on therapy, is recommended as an option for treating severe eosinophilic asthma that is inadequately controlled in adults despite maintenance therapy with high-dose inhaled corticosteroids and long-acting beta-agonists, only if:

- the person has agreed to and followed the optimised standard treatment plan and
- the blood eosinophil count has been recorded as 300 cells per microlitre or more and the person has had 4 or more exacerbations needing systemic corticosteroids in the previous 12 months, or has had continuous oral corticosteroids of at least the equivalent of prednisolone 5 mg per day over the previous 6 months (that is, the person is eligible for mepolizumab) or
- the blood eosinophil count has been recorded as 400 cells per microlitre or more with 3 or more exacerbations needing systemic corticosteroids in the past 12 months (that is, the person is eligible for reslizumab).

**Dupilumab:<sup>(E5)</sup>**

Dupilumab as add-on maintenance therapy is recommended as an option for treating severe asthma with type 2 inflammation that is inadequately controlled in people 12 years and over, despite maintenance therapy with high-dose inhaled corticosteroids and another maintenance treatment, only if:

- the dosage used is 400 mg initially and then 200 mg subcutaneously every other week
- the person has agreed to and follows an optimised standard treatment plan
- the person has a blood eosinophil count of 150 cells per microlitre or more and fractional exhaled nitric oxide of 25 parts per billion or more, and has had at least 4 or more exacerbations in the previous 12 months
- the person is not eligible for mepolizumab, reslizumab or benralizumab, or has asthma that has not responded adequately to these biological therapies

**Mepolizumab:<sup>(E6)</sup>**

Mepolizumab, as an add-on therapy, is recommended as an option for treating severe refractory eosinophilic asthma, only if:

- for adults who have agreed to and followed the optimised standard treatment plan and
- the blood eosinophil count has been recorded as 300 cells per microlitre or more and the person has had at least 4 exacerbations needing systemic corticosteroids in the previous 12 months, or has had continuous oral corticosteroids of at least the equivalent of prednisolone 5 mg per day over the previous 6 months or

- the blood eosinophil count has been recorded as 400 cells per microlitre or more and the person has had at least 3 exacerbations needing systemic corticosteroids in the previous 12 months (so they are also eligible for either benralizumab or reslizumab).

### **Omalizumab:**<sup>(E7)</sup>

Omalizumab is recommended as an option for treating severe persistent confirmed allergic IgE-mediated asthma as an add-on to optimised standard therapy in people aged 6 years and older:

- who need continuous or frequent treatment with oral corticosteroids (defined as 4 or more courses in the previous year)

### **Reslizumab:**<sup>(E8)</sup>

Reslizumab, as an add-on therapy, is recommended as an option for the treatment of severe eosinophilic asthma that is inadequately controlled in adults despite maintenance therapy with high-dose inhaled corticosteroids plus another drug, only if:

- the blood eosinophil count has been recorded as 400 cells per microlitre or more
- the person has had 3 or more severe asthma exacerbations needing systemic corticosteroids in the past 12 months and

### **Assessments:**

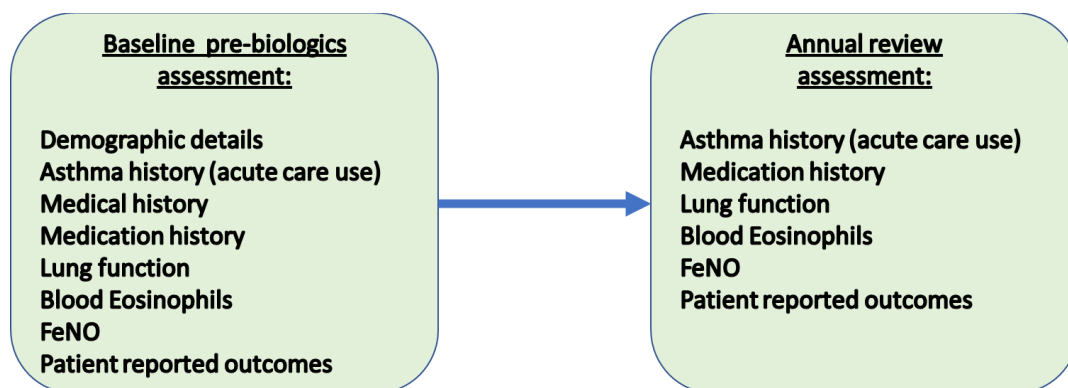

Data recorded at baseline assessment, includes demographic details, asthma/atopy history, comorbidities, exacerbation/acute care attendance in the last 12 months, medication history, biomarkers (blood eosinophil count (BEC) and fractional exhaled nitric oxide (FeNO) and lung function (GLI 2012 predictive values,<sup>E9</sup>). Patient reported outcome measures (PROMs) completed at each assessment included asthma control assessment (ACQ5, asthma control questionnaire and quality of life measures (EuroQOL 5L5D). At annual review, acute care use, medication history,

biomarkers, lung function and PROMS are recorded. To reduce bias towards biologic classes, all biologics approved for use for severe asthma treatment in the UK were included in the analysis, including anti-IL5, anti-IL5R, anti-IL4 $\alpha$ r and anti-IgE.

Patient-reported outcome measures (PROMs) in this study addressed change in quality-of-life and asthma severity.

**Asthma Control Questionnaire (ACQ5 ):**

*Asthma control.* Asthma control was assessed by the five item asthma control questionnaire.<sup>(E10)</sup> An ACQ5 score of 0.75 reflects adequate asthma control, whereas a score of 1.5 or over signals inadequate asthma control. The MCID is a reduction in ACQ5 score of 0.5 or greater.<sup>(E11)</sup>

**EuroQol:**

*Quality of life.* The EuroQoL-5L5D Health scale is a visual analogue scale with which patients report their overall health,<sup>(E12)</sup> 100 is the best health possible and 0 reflects the worst overall health. The EuroQoL-5L5D Index value reflects impairment of activities of daily living, the closer the score is to 1, the less the impairment of daily living. The change in Index Value following an intervention allows evaluation of the health economics of the intervention through calculation of quality-adjusted life years.

**Figure S1: Flow diagram for construction of UKSAR cohort**

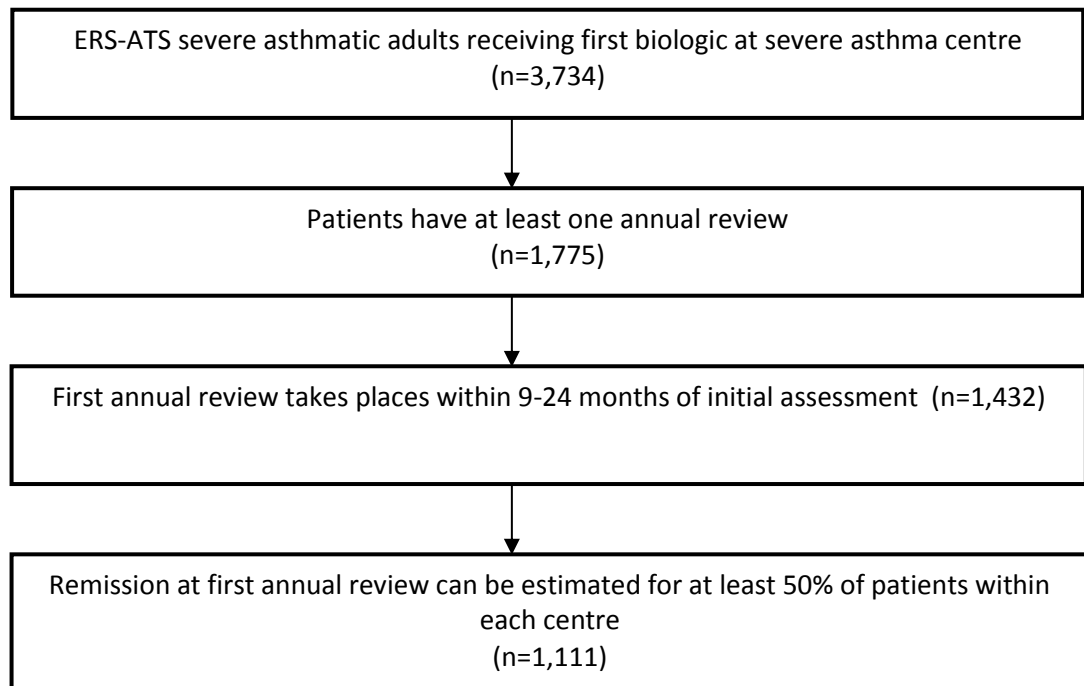

**Table S1: Data completeness (whole cohort (n=1,111))**

| Variable                                               | n (%) non-missing | n (%) missing |
|--------------------------------------------------------|-------------------|---------------|
| Time until Annual review (Years)                       | 1,111 (100.0%)    | 0 (0.0%)      |
| Sex                                                    | 1,111 (100.0%)    | 0 (0.0%)      |
| Age At First Assessment (Years)                        | 1,111 (100.0%)    | 0 (0.0%)      |
| Age at Onset of Symptoms (Years)                       | 976 (87.8%)       | 135 (12.2%)   |
| Duration Of Symptoms From Baseline (Years)             | 976 (87.8%)       | 135 (12.2%)   |
| Ethnicity                                              | 1,109 (99.8%)     | 2 (0.2%)      |
| Smoking Status                                         | 1,083 (97.5%)     | 28 (2.5%)     |
| BMI (kg-m2)                                            | 1,099 (98.9%)     | 12 (1.1%)     |
| Atopic Disease                                         | 1,111 (96.8%)     | 37 (3.2%)     |
| Depression or Anxiety                                  | 1,111 (100.0%)    | 0 (0.0%)      |
| Gastro-oesophageal Reflux                              | 1,111 (100.0%)    | 0 (0.0%)      |
| Nasal polyps                                           | 1,111 (100.0%)    | 0 (0.0%)      |
| OCS bursts (Last Year)                                 | 1,086 (97.7%)     | 25 (2.3%)     |
| Frequent exacerbator at baseline                       | 1,086 (97.7%)     | 25 (2.3%)     |
| Invasive Ventilations (Ever)                           | 1,058 (95.2%)     | 53 (4.8%)     |
| ED Attendances For Asthma (Last Year)                  | 1,073 (96.6%)     | 38 (3.4%)     |
| Hospital Admissions For Asthma (Last Year)             | 1,081 (97.3%)     | 30 (2.7%)     |
| Highest Blood Eosinophil Count (N/10 <sup>9</sup> L) † | 1,093 (98.4%)     | 18 (1.6%)     |
| Blood Eosinophil Count (N/10 <sup>9</sup> L)           | 1,085 (97.7%)     | 26 (2.3%)     |
| FeNO (ppb)                                             | 831 (74.8%)       | 280 (25.2%)   |
| Composite Type 2 status                                | 811 (73.0%)       | 300 (27.0%)   |
| FEV <sub>1</sub> (L)                                   | 1,089 (98.0%)     | 22 (2.0%)     |
| FEV <sub>1</sub> (% Predicted)                         | 1,077 (96.9%)     | 34 (3.1%)     |
| FVC (L)                                                | 1,062 (95.6%)     | 49 (4.4%)     |
| FVC (% Predicted)                                      | 1,026 (92.3%)     | 85 (7.7%)     |
| FEV <sub>1</sub> /FVC                                  | 1,062 (95.6%)     | 49 (4.4%)     |
| ACQ5 Score                                             | 954 (85.9%)       | 157 (14.1%)   |
| Uncontrolled asthma                                    | 954 (85.9%)       | 157 (14.1%)   |
| Puffs of SABA most days (ACQ Q6)                       | 924 (83.2%)       | 187 (16.8%)   |
| EuroQoL Health Scale                                   | 454 (40.9%)       | 657 (59.1%)   |
| EuroQoL Utility                                        | 470 (42.3%)       | 641 (57.7%)   |
| Maintenance OCS                                        | 1,106 (99.5%)     | 5 (0.5%)      |
| Maintenance OCS (mg) *                                 | 634 (99.4%)       | 4 (0.6%)      |
| Inhaled corticosteroids (ICS)                          | 1,111 (100.0%)    | 0 (0.0%)      |
| ICS Dose (BDP equivalent-µg) **                        | 1,025 (92.9%)     | 78 (7.1%)     |
| Theophylline                                           | 1,099 (98.9%)     | 12 (1.1%)     |
| Short-acting β2-agonist (SABA)                         | 1,099 (98.9%)     | 12 (1.1%)     |
| Long-acting β2-agonist (LABA)                          | 1,094 (98.5%)     | 17 (1.5%)     |
| Leukotriene Receptor Antagonists                       | 1,059 (95.3%)     | 52 (4.7%)     |
| Maintenance Macrolides                                 | 1,087 (97.8%)     | 24 (2.2%)     |
| Nebuliser                                              | 1,092 (98.3%)     | 19 (1.7%)     |
| Biologic commenced                                     | 981 (88.3%)       | 130 (11.7%)   |
| Biologic type commenced                                | 981 (88.3%)       | 130 (11.7%)   |
| ERS-ATS Severe Asthma                                  | 1,111 (100.0%)    | 0 (0.0%)      |
| Hospital                                               | 1,111 (100.0%)    | 0 (0.0%)      |

† highest recorded according to prior medical records. 'Last Year' refers to measures assessed using clinical records in the 12 months prior to initial presentation at the severe asthma centre, other measures were as observed or recorded at initial presentation unless otherwise indicated.\*among patients on oral corticosteroids\*\*among patients on inhaled corticosteroids

BMI: Body Mass Index; OCS: Oral Corticosteroid Steroids; ED: Emergency Department; FeNO: Fractional Exhaled Nitric Oxide; ppb: Parts per Billion; FEV<sub>1</sub>: Forced Expiratory Volume (1 second); FVC: Forced Vital Capacity; ACQ: Asthma Control Questionnaire; ICS: Inhaled Corticosteroid Steroids; BDP: Beclometasone Dipropionate; SABA: Short-Acting Beta Agonists; LABA: Long-Acting Beta Agonists; LAMA: Long-Acting Muscarinic Antagonist; ERS-ATS: European Respiratory Society-American Thoracic Society definition severe asthma 'asthma which requires treatment with GINA step 4-5 treatment or oral corticosteroids (OCS) for 50% of the last year to prevent it becoming uncontrolled'

**Table S2: Summary statistics for scalar variables (whole cohort (n=1,111))**

| Variable                                               | Mean (SD)      | Median (IQR)     |
|--------------------------------------------------------|----------------|------------------|
| Time until Annual review (Years)                       | 1.2 (0.3)      | 1.1 (1.0,1.3)    |
| Age At First Assessment (Years)                        | 50.8 (14.5)    | 52.0 (41.0,61.0) |
| Age at Onset of Symptoms (Years)                       | 25.7 (19.9)    | 21.0 (7.0,41.0)  |
| Duration Of Symptoms From Baseline (Years)             | 25.1 (17.3)    | 23.0 (10.0,37.0) |
| BMI (kg-m <sup>2</sup> )                               | 30.8 (7.4)     | 29.8 (26.1,34.8) |
| OCS bursts (Last Year)                                 | 5.9 (4.0)      | 5 (3,8)          |
| ED Attendances For Asthma (Last Year)                  | 1.7 (3.9)      | 0 (0,2)          |
| Hospital Admissions For Asthma (Last Year)             | 1.1 (2.1)      | 0 (0,1)          |
| Highest Blood Eosinophil Count (N/10 <sup>9</sup> L) † | 0.94 (1.11)    | 0.70 (0.44,1.10) |
| Blood Eosinophil Count (N/10 <sup>9</sup> L)           | 0.50 (0.57)    | 0.40 (0.20,0.65) |
| FeNO (ppb)                                             | 57.8 (49.0)    | 43.0 (24.0,75.0) |
| FEV <sub>1</sub> (L)                                   | 2.1 (0.8)      | 2.0 (1.5,2.6)    |
| FEV <sub>1</sub> (% Predicted)                         | 67.3 (21.3)    | 66.9 (52.1,81.5) |
| FVC (L)                                                | 3.3 (1.0)      | 3.1 (2.5,3.9)    |
| FVC (% Predicted)                                      | 85.9 (19.1)    | 85.9 (73.4,97.8) |
| FEV <sub>1</sub> /FVC                                  | 63.1 (18.7)    | 63.6 (53.7,72.1) |
| ACQ5 Score                                             | 3.0 (1.4)      | 3.2 (2.0,4.0)    |
| EuroQoL Health Scale                                   | 56.5 (21.3)    | 60.0 (40.0,70.0) |
| EuroQoL Utility                                        | 0.7 (0.3)      | 0.8 (0.6,0.9)    |
| Maintenance OCS (mg) *                                 | 12.9 (8.7)     | 10 (8,15)        |
| ICS Dose (BDP equivalent-µg) **                        | 1950.5 (640.1) | 2000 (1600,2000) |

† highest recorded according to prior medical records. 'Last Year' refers to measures assessed using clinical records in the 12 months prior to initial presentation at the severe asthma centre, other measures were as observed or recorded at initial presentation unless otherwise indicated

\* among patients on OCS

\*\* among patients on inhaled corticosteroids

SD: Standard Deviation; IQR: InterQuartile Range; BMI: Body Mass Index; ED: Emergency Department; FEV<sub>1</sub>: Forced Expiratory Volume in 1 second; FVC: Forced Vital Capacity; FeNO: Fractional exhaled Nitric Oxide; ACQ: Asthma Control Questionnaire; OCS: Oral Corticosteroids; ICS: Inhaled Corticosteroids; BDP: Beclometasone Dipropionate



**Table S3. Baseline demographics of the whole cohort at initial assessment prior to commencing biologics (n=1,111)**

| Variable                                                        | n        | Category                           | Result           |
|-----------------------------------------------------------------|----------|------------------------------------|------------------|
| Time to first Annual Review (Years)                             | 1,111    |                                    | 1.1 (1.0,1.3)    |
| Time to first Annual Review (Months)                            | 1,111    | >=9 & <12 months                   | 352 (31.7%)      |
|                                                                 |          | >=12 & <18 months                  | 587 (52.8%)      |
|                                                                 |          | >=18 & <=24 months                 | 172 (15.5%)      |
| Sex                                                             | 1,111    | Female                             | 667 (60.0%)      |
| Age At First Assessment (Years)                                 | 1,111    |                                    | 52.0 (41.0,61.0) |
| Ethnicity                                                       | 1,109    | White                              | 966 (87.1%)      |
|                                                                 |          | Non-White                          | 143 (12.9%)      |
| Smoking Status                                                  | 1,083    | Never                              | 723 (66.8%)      |
| BMI (kg-m2)                                                     | 1,099    |                                    | 29.8 (26.1,34.8) |
| BMI ≥30kg-m2                                                    |          | ≥30                                | 540 (49.1%)      |
| Atopic Disease                                                  | 1,111    |                                    | 567 (51.0%)      |
| Depression or Anxiety                                           | 1,111    |                                    | 129 (11.6%)      |
| Gastro-oesophageal Reflux                                       | 1,111    |                                    | 224 (20.2%)      |
| Nasal polyps                                                    | 1,111    |                                    | 237 (21.3%)      |
| OCS bursts (Last Year)                                          | 1,086    |                                    | 5 (3,8)          |
| Any OCS bursts (Last Year)                                      | 1,086    |                                    | 1,020 (93.9%)    |
| Frequent exacerbator at baseline                                | 1,086    | ≥3 exacerbations in last year      | 906 (83.4%)      |
| Invasive Ventilations (Ever)                                    | 1,058    |                                    | 101 (9.5%)       |
| ED Attendances For asthma (Last Year)                           | 1,073    |                                    | 0 (0,2)          |
| Any ED Attendance for asthma (Last Year)                        | 1,073    |                                    | 435 (40.5%)      |
| Any Hospital Admissions for asthma (Last Year)                  | 1,081    |                                    | 431 (39.9%)      |
| Hospital Admissions for asthma (Last Year)                      | 1,081    | ≥2                                 | 253 (23.4%)      |
| Highest Blood Eosinophil Count recorded (N/10 <sup>9</sup> L) † | 1,093    |                                    | 0.70 (0.44,1.10) |
| Blood Eosinophil Count (N/10 <sup>9</sup> L)                    | 1,085    |                                    | 0.40 (0.20,0.65) |
| Blood Eosinophil Count (N/10 <sup>9</sup> L)                    | 1,085    | <0.15                              | 219 (20.2%)      |
|                                                                 |          | ≥0.15 & <0.30                      | 131 (12.1%)      |
|                                                                 |          | ≥0.30 & ≤0.45                      | 264 (24.3%)      |
|                                                                 |          | >0.45                              | 471 (43.4%)      |
| FeNO (ppb)                                                      | 831      |                                    | 43.0 (24.0,75.0) |
| FeNO                                                            | 831      | <20ppb                             | 167 (20.1%)      |
|                                                                 |          | ≥20 & <50ppb                       | 299 (36.0%)      |
|                                                                 |          | ≥50ppb                             | 365 (43.9%)      |
| Composite T2-Group                                              | 811      | Eos Low (<0.15) / FeNO Low (<20)   | 48 (5.9%)        |
|                                                                 |          | Eos High (≥0.15) / FeNO Low (<20)  | 111 (13.7%)      |
|                                                                 |          | Eos Low (<0.15) / FeNO High (≥20)  | 126 (15.5%)      |
|                                                                 |          | Eos High (≥0.15) / FeNO High (≥20) | 526 (64.9%)      |
| Clinic FEV <sub>1</sub> (L)                                     | 1,089    |                                    | 2.0 (1.5,2.6)    |
| Clinic FEV <sub>1</sub> (% Predicted)                           | 1,077    |                                    | 66.9 (52.1,81.5) |
| Clinic FVC (L)                                                  | 1,062    |                                    | 3.1 (2.5,3.9)    |
| Clinic FVC (% Predicted)                                        | 1,026    |                                    | 85.9 (73.4,97.8) |
| Clinic FEV <sub>1</sub> /FVC                                    | 1,062    |                                    | 63.6 (53.7,72.1) |
| ACQ5 Score                                                      | 954      |                                    | 3.2 (2.0,4.0)    |
| Uncontrolled Asthma                                             | 954      | ACQ5≥1.5                           | 807 (84.6%)      |
| Maintenance OCS                                                 | 1,106    |                                    | 638 (57.7%)      |
| Maintenance OCS (mg)                                            | 1,102634 |                                    | 10 (8,15)        |
| Inhaled corticosteroids (ICS)                                   | 1,111    |                                    | 1,103 (99.3%)    |
| ICS Dose (BDP equivalent-µg)                                    | 1,025    |                                    | 2000 (1600,2000) |
| Theophylline                                                    | 1,099    |                                    | 299 (27.2%)      |
| Long-acting β2-agonist (LABA)                                   | 1,094    |                                    | 1,013 (92.6%)    |
| Long acting anti-muscarinic agent (LAMA)                        | 1,095    |                                    | 709 (64.7%)      |
| Leukotriene Receptor Antagonists                                | 1,059    |                                    | 548 (51.7%)      |

|                                |       |                     |                |
|--------------------------------|-------|---------------------|----------------|
| <b>Maintenance Macrolides</b>  | 1,087 |                     | 100 (9.2%)     |
| <b>Biologic type commenced</b> | 981   | Anti-IL5            | 828 (84.4%)    |
|                                |       | Anti-IgE            | 150 (15.3%)    |
|                                |       | Anti-IL4 R $\alpha$ | 3 (0.3%)       |
| <b>ERS-ATS Severe Asthma</b>   | 1,111 | Yes                 | 1,111 (100.0%) |

‡ Median (IQR) or count (%) as appropriate; † highest recorded according to prior medical records. 'Last Year' refers to measures assessed using clinical records in the 12 months prior to initial presentation at the severe asthma centre, other measures were as observed or recorded at initial presentation unless otherwise indicated. \*among patients on oral corticosteroids\*\*among patients on inhaled corticosteroids

BMI: Body Mass Index; OCS: Oral Corticosteroid Steroids; ED: Emergency Department; FeNO: Fractional Exhaled Nitric Oxide; ppb: Parts per Billion; FEV<sub>1</sub>: Forced Expiratory Volume (1 second); FVC: Forced Vital Capacity; ACQ: Asthma Control Questionnaire; ICS: Inhaled Corticosteroid Steroids; BDP: Beclometasone Dipropionate; SABA: Short-Acting Beta-2 Agonists; LABA: Long-Acting Beta-2 Agonists; LAMA: Long-Acting Muscarinic Antagonist; ERS-ATS: European Respiratory Society-American Thoracic Society

**Table S4: Baseline demographics of the primary remission/non-remission‡ cohort (n=830)**

| Variable                                                        | n   | Category                           | Result           |
|-----------------------------------------------------------------|-----|------------------------------------|------------------|
| Time to first Annual Review (Years)                             | 830 |                                    | 1.1 (1.0,1.3)    |
| Time to first Annual Review (Months)                            | 830 | >=9 & <12 months                   | 279 (33.6%)      |
|                                                                 |     | >=12 & <18 months                  | 430 (51.8%)      |
|                                                                 |     | >=18 & <=24 months                 | 121 (14.6%)      |
| Sex                                                             | 830 | Female                             | 489 (58.9%)      |
| Age At First Assessment (Years)                                 | 830 |                                    | 52.0 (42.0,61.0) |
| Age at Onset of Symptoms (Years)                                | 737 |                                    | 22.0 (7.0,41.0)  |
| Age Of Onset of Symptoms (Years)                                | 737 | ≥40                                | 209 (28.4%)      |
| Duration Of Symptoms From Baseline (Years)                      | 737 |                                    | 23.0 (11.0,37.0) |
| Duration Of Symptoms From Baseline (Years)                      |     | <20                                | 308 (41.8%)      |
|                                                                 |     | ≥12 & <18                          | 147 (19.9%)      |
|                                                                 |     | ≥18                                | 282 (38.3%)      |
| Ethnicity                                                       | 828 | White                              | 724 (87.4%)      |
| Smoking Status                                                  | 809 | Never                              | 539 (66.6%)      |
| BMI (kg-m2)                                                     | 823 |                                    | 30.0 (26.3,34.8) |
| BMI (kg-m2)                                                     | 823 | <25                                | 144 (17.5%)      |
|                                                                 |     | ≥25 & <30                          | 271 (32.9%)      |
|                                                                 |     | ≥30                                | 408 (49.6%)      |
| Atopic Disease                                                  | 830 |                                    | 427 (51.4%)      |
| Depression or Anxiety                                           | 830 |                                    | 88 (10.6%)       |
| Gastro-oesophageal Reflux                                       | 830 |                                    | 144 (17.3%)      |
| Nasal polyps                                                    | 830 |                                    | 171 (20.6%)      |
| OCS bursts (Last Year)                                          | 817 |                                    | 5 (3,8)          |
| Any OCS bursts (Last Year)                                      | 817 |                                    | 762 (93.3%)      |
| Frequent exacerbator at baseline                                | 817 | ≥3 exacerbations in last year      | 668 (81.8%)      |
| Invasive Ventilations (Ever)                                    | 798 |                                    | 76 (9.5%)        |
| ED Attendances For asthma (Last Year)                           | 807 |                                    | 0 (0,2)          |
| Any ED Attendance for asthma (Last Year)                        | 807 |                                    | 293 (36.3%)      |
| Hospital Admissions for asthma (Last Year)                      | 814 |                                    | 0 (0,1)          |
| Any Hospital Admissions for asthma (Last Year)                  | 814 |                                    | 315 (38.7%)      |
| Hospital Admissions for asthma (Last Year)                      | 814 | ≥2                                 | 183 (22.4%)      |
| Highest Blood Eosinophil Count recorded (N/10 <sup>9</sup> L) † | 821 |                                    | 0.70 (0.45,1.08) |
| Blood Eosinophil Count (N/10 <sup>9</sup> L)                    | 819 |                                    | 0.40 (0.20,0.62) |
| Blood Eosinophil Count (N/10 <sup>9</sup> L)                    | 819 | <0.15                              | 175 (21.4%)      |
|                                                                 |     | ≥0.15 & <0.30                      | 96 (11.7%)       |
|                                                                 |     | ≥0.30 & ≤0.45                      | 196 (23.9%)      |
|                                                                 |     | >0.45                              | 352 (43.0%)      |
| FeNO (ppb)                                                      | 638 |                                    | 43.0 (24.0,74.0) |
| FeNO (ppb)                                                      | 638 | <20ppb                             | 123 (19.3%)      |
|                                                                 |     | ≥20 & <50ppb                       | 234 (36.7%)      |
|                                                                 |     | ≥50ppb                             | 281 (44.0%)      |
| Composite Type 2 status                                         | 627 | Eos Low (<0.15) / FeNO Low (<20)   | 40 (6.4%)        |
|                                                                 |     | Eos High (≥0.15) / FeNO Low (<20)  | 79 (12.6%)       |
|                                                                 |     | Eos Low (<0.15) / FeNO High (≥20)  | 107 (17.1%)      |
|                                                                 |     | Eos High (≥0.15) / FeNO High (≥20) | 401 (64.0%)      |
| FEV <sub>1</sub> (L)                                            | 818 |                                    | 2.0 (1.5,2.6)    |
| FEV <sub>1</sub> (% Predicted)                                  | 811 |                                    | 67.2 (52.5,81.9) |
| FVC (L)                                                         | 802 |                                    | 3.2 (2.5,3.9)    |
| FVC (% Predicted)                                               | 772 |                                    | 85.5 (74.1,97.7) |
| FEV <sub>1</sub> /FVC                                           | 802 |                                    | 64.0 (54.3,72.3) |
| ACQ5 Score                                                      | 736 |                                    | 3.0 (2.0,4.0)    |
| Uncontrolled Asthma                                             | 736 | ACQ5≥1.5                           | 622 (84.5%)      |
| EuroQoL Health Scale                                            | 350 |                                    | 60.0 (44.0,73.0) |
| EuroQoL Utility                                                 | 362 |                                    | 0.7 (0.5,0.9)    |
| Maintenance OCS                                                 | 826 |                                    | 475 (57.5%)      |

|                                                         |     |     |                  |
|---------------------------------------------------------|-----|-----|------------------|
| <b>Maintenance OCS (mg) *</b>                           | 474 |     | 10 (8,15)        |
| <b>Inhaled corticosteroids (ICS)</b>                    | 830 |     | 827 (99.6%)      |
| <b>ICS Dose (BDP equivalent-<math>\mu</math>g) **</b>   | 775 |     | 2000 (1600,2000) |
| <b>Theophylline</b>                                     | 821 |     | 216 (26.3%)      |
| <b>Short- acting <math>\beta</math>2-agonist (SABA)</b> | 823 |     | 785 (95.4%)      |
| <b>Long-acting <math>\beta</math>2-agonist (LABA)</b>   | 818 |     | 763 (93.3%)      |
| <b>Long acting anti-muscarinic agent (LAMA)</b>         | 821 |     | 525 (63.9%)      |
| <b>Leukotriene Receptor Antagonists</b>                 | 799 |     | 407 (50.9%)      |
| <b>Maintenance Macrolides</b>                           | 816 |     | 69 (8.5%)        |
| <b>Nebuliser</b>                                        | 819 |     | 180 (22.0%)      |
| <b>ERS-ATS Severe Asthma</b>                            | 830 | Yes | 830 (100.0%)     |

‡ ACQ5 <1.5, no mOCS or OCS bursts, FEV<sub>1</sub> above LLN or <100mls less than pre-biologic FEV

† Median (IQR) or count (%) as appropriate; † highest recorded according to prior medical records. 'Last Year' refers to measures assessed using clinical records in the 12 months prior to initial presentation at the severe asthma centre, other measures were as observed or recorded at initial presentation unless otherwise indicated

\* among patients on oral corticosteroids

\*\* among patients on inhaled corticosteroids

BMI: Body Mass Index; OCS: Oral Corticosteroid Steroids; ED: Emergency Department; FeNO: Fractional Exhaled Nitric Oxide; ppb: Parts per Billion; FEV<sub>1</sub>: Forced Expiratory Volume (1 second); FVC: Forced Vital Capacity; ACQ: Asthma Control Questionnaire; ICS: Inhaled Corticosteroid Steroids; BDP: Beclometasone Dipropionate; SABA: Short-Acting Beta Agonists; LABA: Long-Acting Beta Agonists; LAMA: Long-Acting Muscarinic Antagonist; ERS-ATS: European Respiratory Society-American Thoracic Society

**Table S5: Data completeness of the primary remission cohort by remission status‡ (n=830)**

| Variable                                               | Non remission (81.7% (678)) |               | Remission (18.3% (152)) |               |
|--------------------------------------------------------|-----------------------------|---------------|-------------------------|---------------|
|                                                        | n (%) non-missing           | n (%) missing | n (%) non-missing       | n (%) missing |
| Time until Annual review (Years)                       | 678 (100.0%)                | 0 (0.0%)      | 152 (100.0%)            | 0 (0.0%)      |
| Sex                                                    | 678 (100.0%)                | 0 (0.0%)      | 152 (100.0%)            | 0 (0.0%)      |
| Age At First Assessment (Years)                        | 678 (100.0%)                | 0 (0.0%)      | 152 (100.0%)            | 0 (0.0%)      |
| Age at Onset of Symptoms (Years)                       | 600 (88.5%)                 | 78 (11.5%)    | 137 (90.1%)             | 15 (9.9%)     |
| Duration Of Symptoms From Baseline (Years)             | 600 (88.5%)                 | 78 (11.5%)    | 137 (90.1%)             | 15 (9.9%)     |
| Ethnicity                                              | 676 (99.7%)                 | 2 (0.3%)      | 152 (100.0%)            | 0 (0.0%)      |
| Smoking Status                                         | 663 (97.8%)                 | 15 (2.2%)     | 146 (96.1%)             | 6 (3.9%)      |
| BMI (kg-m2)                                            | 671 (99.0%)                 | 7 (1.0%)      | 152 (100.0%)            | 0 (0.0%)      |
| Atopic Disease                                         | 678 (98.0%)                 | 14 (2.0%)     | 152 (100.0%)            | 0 (0.0%)      |
| Depression or Anxiety                                  | 678 (100.0%)                | 0 (0.0%)      | 152 (100.0%)            | 0 (0.0%)      |
| Gastro-oesophageal Reflux                              | 678 (100.0%)                | 0 (0.0%)      | 152 (100.0%)            | 0 (0.0%)      |
| Nasal polyps                                           | 678 (100.0%)                | 0 (0.0%)      | 152 (100.0%)            | 0 (0.0%)      |
| Rescue Steroids In Last Year                           | 667 (98.4%)                 | 11 (1.6%)     | 150 (98.7%)             | 2 (1.3%)      |
| Frequent exacerbator at baseline                       | 667 (98.4%)                 | 11 (1.6%)     | 150 (98.7%)             | 2 (1.3%)      |
| Invasive Ventilations (Ever)                           | 650 (95.9%)                 | 28 (4.1%)     | 148 (97.4%)             | 4 (2.6%)      |
| A&E Attendances For Asthma In Last Year                | 661 (97.5%)                 | 17 (2.5%)     | 146 (96.1%)             | 6 (3.9%)      |
| Hospital Admissions For Asthma In Last Year            | 666 (98.2%)                 | 12 (1.8%)     | 148 (97.4%)             | 4 (2.6%)      |
| Highest Blood Eosinophil Count (N/10 <sup>9</sup> L) † | 671 (99.0%)                 | 7 (1.0%)      | 150 (98.7%)             | 2 (1.3%)      |
| Blood Eosinophil Count (N/10 <sup>9</sup> L)           | 670 (98.8%)                 | 8 (1.2%)      | 149 (98.0%)             | 3 (2.0%)      |
| FeNO (ppb)                                             | 504 (74.3%)                 | 174 (25.7%)   | 134 (88.2%)             | 18 (11.8%)    |
| Composite T2 status                                    | 496 (73.2%)                 | 182 (26.8%)   | 131 (86.2%)             | 21 (13.8%)    |
| FEV1 (L)                                               | 667 (98.4%)                 | 11 (1.6%)     | 151 (99.3%)             | 1 (0.7%)      |
| FEV1 (% Predicted)                                     | 660 (97.3%)                 | 18 (2.7%)     | 151 (99.3%)             | 1 (0.7%)      |
| FVC (L)                                                | 653 (96.3%)                 | 25 (3.7%)     | 149 (98.0%)             | 3 (2.0%)      |
| FVC (% Predicted)                                      | 629 (92.8%)                 | 49 (7.2%)     | 143 (94.1%)             | 9 (5.9%)      |
| FEV1/FVC                                               | 653 (96.3%)                 | 25 (3.7%)     | 149 (98.0%)             | 3 (2.0%)      |
| ACQ5 Score                                             | 598 (88.2%)                 | 80 (11.8%)    | 138 (90.8%)             | 14 (9.2%)     |
| Puffs of SABA most days (ACQ Q6)                       | 582 (85.8%)                 | 96 (14.2%)    | 129 (84.9%)             | 23 (15.1%)    |
| EuroQoL Health Scale                                   | 273 (40.3%)                 | 405 (59.7%)   | 77 (50.7%)              | 75 (49.3%)    |
| EuroQoL Utility                                        | 285 (42.0%)                 | 393 (58.0%)   | 77 (50.7%)              | 75 (49.3%)    |
| Maintenance OCS                                        | 674 (99.4%)                 | 4 (0.6%)      | 152 (100.0%)            | 0 (0.0%)      |
| Maintenance OCS (mg) *                                 | 397 (99.7%)                 | 1 (0.3%)      | 77 (100.0%)             | 0 (0.0%)      |
| Inhaled corticosteroids (ICS)                          | 678 (100.0%)                | 0 (0.0%)      | 152 (100.0%)            | 0 (0.0%)      |
| ICS Dose (BDP equivalent-µg) **                        | 632 (93.2%)                 | 46 (6.8%)     | 143 (94.7%)             | 8 (5.3%)      |
| Theophylline                                           | 673 (99.3%)                 | 5 (0.7%)      | 148 (97.4%)             | 4 (2.6%)      |
| Short-acting β2-agonist (SABA)                         | 673 (99.3%)                 | 5 (0.7%)      | 150 (98.7%)             | 2 (1.3%)      |
| Long-acting β2-agonist (LABA)                          | 667 (98.4%)                 | 11 (1.6%)     | 151 (99.3%)             | 1 (0.7%)      |
| Long acting anti-muscarinic agent (LAMA)               | 670 (98.8%)                 | 8 (1.2%)      | 151 (99.3%)             | 1 (0.7%)      |
| Leukotriene Receptor Antagonists                       | 653 (96.3%)                 | 25 (3.7%)     | 146 (96.1%)             | 6 (3.9%)      |
| Maintenance Macrolides                                 | 665 (98.1%)                 | 13 (1.9%)     | 151 (99.3%)             | 1 (0.7%)      |
| Nebuliser                                              | 670 (98.8%)                 | 8 (1.2%)      | 149 (98.0%)             | 3 (2.0%)      |
| Biologic commenced                                     | 678 (100.0%)                | 0 (0.0%)      | 152 (100.0%)            | 0 (0.0%)      |
| Biologic type commenced                                | 609 (89.8%)                 | 69 (10.2%)    | 138 (90.8%)             | 14 (9.2%)     |
| ERS-ATS Asthma                                         | 678 (100.0%)                | 0 (0.0%)      | 152 (100.0%)            | 0 (0.0%)      |
| Hospital                                               | 678 (100.0%)                | 0 (0.0%)      | 152 (100.0%)            | 0 (0.0%)      |

‡ ACQ5 <1.5, no mOCS or OCS bursts, FEV<sub>1</sub> above LLN or <100mls less than pre-biologic FEV<sub>1</sub>

† highest recorded according to prior medical records. 'Last Year' refers to measures assessed using clinical records in the 12 months prior to initial presentation at the severe asthma centre, other measures were as observed or recorded at initial presentation unless otherwise indicated

\*among patients on OCS

\*\* among patients on inhaled corticosteroids

BMI: Body Mass Index; OCS: Oral Corticosteroid Steroids; ED: Emergency Department; FeNO: Fractional Exhaled Nitric Oxide; ppb: Parts per Billion; FEV<sub>1</sub>: Forced Expiratory Volume (1 second); FVC: Forced Vital Capacity; ACQ: Asthma Control Questionnaire; ICS: Inhaled Corticosteroid Steroids; BDP: Beclometasone Dipropionate; SABA: Short-Acting Beta Agonists; LABA: Long-Acting Beta Agonists; LAMA: Long-Acting Muscarinic Antagonist; ERS-ATS: European Respiratory Society-American Thoracic Society

**Table S6: Summary statistics for scalar variables in the primary remission cohort by remission status‡ (n=830)**

| Variable                                               | Non remission (81.7% (678)) |                  | Remission (18.3% (152)) |                  |
|--------------------------------------------------------|-----------------------------|------------------|-------------------------|------------------|
|                                                        | Mean (SD)                   | Median (IQR)     | Mean (SD)               | Median (IQR)     |
| Time until Annual review (Years)                       | 1.2 (0.3)                   | 1.1 (1.0,1.4)    | 1.1 (0.3)               | 1.1 (1.0,1.2)    |
| Age At First Assessment (Years)                        | 49.7 (14.4)                 | 51.0 (41.0,59.0) | 55.2 (13.2)             | 55.0 (48.0,65.0) |
| Age at Onset of Symptoms (Years)                       | 23.9 (18.8)                 | 20.0 (6.0,39.0)  | 33.6 (21.4)             | 32.0 (14.0,52.0) |
| Duration Of Symptoms From Baseline (Years)             | 25.7 (17.1)                 | 24.5 (12.0,37.0) | 21.6 (16.6)             | 20.0 (8.0,32.0)  |
| BMI (kg-m <sup>2</sup> )                               | 31.4 (7.3)                  | 30.5 (26.6,35.1) | 29.2 (7.2)              | 27.9 (25.4,31.8) |
| Rescue Steroids In Last Year                           | 6.1 (4.1)                   | 5 (3,8)          | 4.7 (3.1)               | 4 (3,6)          |
| A&E Attendances For Asthma (Last Year)                 | 1.6 (3.9)                   | 0 (0,2)          | 0.6 (1.8)               | 0 (0,0)          |
| Hospital Admissions For Asthma (Last Year)             | 1.2 (2.1)                   | 0 (0,1)          | 0.6 (1.2)               | 0 (0,1)          |
| Highest Blood Eosinophil Count (N/10 <sup>9</sup> L) † | 0.88 (1.11)                 | 0.68 (0.40,1.00) | 1.13 (1.25)             | 0.79 (0.58,1.33) |
| Blood Eosinophil Count (N/10 <sup>9</sup> L)           | 0.49 (0.64)                 | 0.39 (0.18,0.60) | 0.52 (0.50)             | 0.46 (0.22,0.70) |
| FeNO (ppb)                                             | 55.1 (46.9)                 | 41.0 (22.0,72.0) | 64.0 (45.8)             | 51.0 (35.0,81.0) |
| FEV <sub>1</sub> (L)                                   | 2.0 (0.8)                   | 2.0 (1.5,2.6)    | 2.2 (0.9)               | 2.1 (1.6,2.7)    |
| FEV <sub>1</sub> (% Predicted)                         | 66.8 (20.7)                 | 67.0 (52.4,81.2) | 72.2 (23.5)             | 68.6 (55.0,88.2) |
| FVC (L)                                                | 3.2 (1.0)                   | 3.1 (2.5,3.9)    | 3.4 (1.1)               | 3.3 (2.7,4.2)    |
| FVC (% Predicted)                                      | 85.1 (18.8)                 | 85.2 (73.8,97.0) | 89.3 (19.8)             | 86.7 (75.8,99.4) |
| FEV <sub>1</sub> /FVC                                  | 63.5 (21.3)                 | 63.7 (54.3,72.2) | 63.6 (12.9)             | 64.5 (54.4,73.6) |
| EuroQoL Health Scale                                   | 54.6 (20.1)                 | 60.0 (40.0,70.0) | 67.4 (19.8)             | 75.0 (50.0,85.0) |
| EuroQoL Utility                                        | 0.6 (0.3)                   | 0.7 (0.5,0.8)    | 0.8 (0.2)               | 0.9 (0.8,1.0)    |
| ACQ5 Score                                             | 3.2 (1.3)                   | 3.2 (2.2,4.2)    | 2.2 (1.4)               | 2.0 (1.2,3.4)    |
| Maintenance OCS (mg) *                                 | 13.5 (9.1)                  | 10 (8,15)        | 10.0 (5.2)              | 10 (7,10)        |
| ICS Dose (BDP equivalent-µg) **                        | 1961.0 (624.6)              | 2000 (1600,2000) | 2005.8 (767.9)          | 2000 (1600,2000) |

‡ ACQ5 <1.5, no mOCS or OCS bursts, FEV<sub>1</sub> above LLN or <100mls less than pre-biologic FEV<sub>1</sub>

† highest recorded according to prior medical records. 'Last Year' refers to measures assessed using clinical records in the 12 months prior to initial presentation at the severe asthma centre, other measures were as observed or recorded at initial presentation unless otherwise indicated

\* among patients on OCS

\* among patients on inhaled corticosteroids

SD: Standard Deviation; IQR: InterQuartile Range; BMI: Body Mass Index; ED: Emergency Department; FEV<sub>1</sub>: Forced Expiratory Volume in 1 second; FVC: Forced Vital Capacity; FeNO: Fractional exhaled Nitric Oxide; ACQ: Asthma Control Questionnaire; OCS: Oral Corticosteroids; ICS: Inhaled Corticosteroids; BDP: Beclometasone Dipropionate

**Table S7: Clinical characteristics and outcomes at baseline and after 1 year on biologics**

|                                                         | N     | Baseline         | Annual Review 1   | p-value |
|---------------------------------------------------------|-------|------------------|-------------------|---------|
| Time to first annual review (years)                     | 1,111 | -                | 1.1 (1.0,1.3)     | -       |
| BMI (kg/m <sup>2</sup> )                                | 955   | 30.0 (26.1,35.0) | 29.9 (26.1,35.1)  | 0.011   |
| Rescue Steroids In Last Year                            | 1040  | 5 (3,8)          | 1 (0,3)           | <0.001  |
| Any Rescue Steroids in Last Year                        | 1040  | 975 (93.8%)      | 656 (63.1%)       | <0.001  |
| Frequent exacerbator (≥3 exacerbations in last year)    | 1040  | 864 (83.1%)      | 302 (29.0%)       | 0.002   |
| ED attendances for asthma (last year)                   | 1015  | 0 (0,2)          | 0 (0,0)           | <0.001  |
| Any ED attendance for asthma (last year)                | 1015  | 397 (39.1%)      | 139 (13.7%)       | <0.001  |
| Hospital admissions for asthma (last year)              | 984   | 0 (0,1)          | 0 (0,0)           | <0.001  |
| Any hospital admission for asthma (last year)           | 984   | 395 (40.1%)      | 140 (14.2%)       | <0.001  |
| Blood eosinophil count (10 <sup>9</sup> /L)             | 738   | 0.37 (0.16,0.61) | 0.06 (0.00,0.14)  | <0.001  |
| FEV1 (L)                                                | 941   | 2.0 (1.5,2.6)    | 2.2 (1.6,2.7)     | <0.001  |
| FEV1 (% predicted)                                      | 929   | 67.4 (52.4,81.9) | 73.3 (58.7,87.5)  | <0.001  |
| FVC (L)                                                 | 870   | 3.2 (2.5,3.9)    | 3.2 (2.5,4.0)     | 0.507   |
| FVC (% predicted)                                       | 831   | 86.2 (74.0,98.3) | 87.8 (74.5,100.0) | 0.065   |
| FEV1/FVC                                                | 868   | 63.6 (53.6,72.3) | 68.0 (58.7,75.7)  | <0.001  |
| FeNO (ppb)                                              | 567   | 43.0 (23.0,73.0) | 36.0 (16.0,69.0)  | <0.001  |
| ACQ5 Score                                              | 851   | 3.0 (2.0,4.0)    | 2.0 (0.8,3.2)     | <0.001  |
| ACQ5≥1.5                                                | 851   | 721 (84.7%)      | 514 (60.0%)       | <0.001  |
| ACQ6 Score                                              | 806   | 3.0 (2.0,4.0)    | 1.8 (0.8,3.2)     | <0.001  |
| ACQ6 ≥1.5                                               | 806   | 690 (85.6%)      | 491 (60.9%)       | <0.001  |
| ACQ7 Score                                              | 806   | 3.1 (2.2,4.0)    | 2.1 (1.3,3.3)     | <0.001  |
| ACQ7 ≥1.5                                               | 806   | 712 (88.3%)      | 549 (68.1%)       | <0.001  |
| <b>Reported number of SABA puffs most days (ACQ Q6)</b> | 806   |                  |                   |         |
| None                                                    |       | 96 (11.9%)       | 203 (25.2%)       | <0.001  |
| 1-2 puffs                                               |       | 120 (14.5%)      | 168 (20.8%)       |         |
| 3-4 puffs                                               |       | 155 (19.2%)      | 135 (16.8%)       |         |
| 5-8 puffs                                               |       | 165 (20.5%)      | 135 (16.8%)       |         |
| 9-12 puffs                                              |       | 123 (15.3%)      | 85 (10.6%)        |         |
| 13-16 puffs                                             |       | 73 (9.1%)        | 36 (4.5%)         |         |
| >16 puffs                                               |       | 74 (9.2%)        | 44 (5.5%)         |         |
| <b>Maintenance OCS</b>                                  | 1085  | 625 (57.6%)      | 517 (47.7%)       | <0.001  |

Median (IQR) or count (%) as appropriate 'Last Year' refers to measures assessed using clinical records in the 12 months prior to either baseline visit to the severe asthma clinic or at annual review, otherwise measures were as observed or recorded at the relevant time-point.

BMI: Body Mass Index; OCS: Oral Corticosteroid Steroids; ED: Emergency Department; FeNO: Fractional Exhaled Nitric Oxide; ppb: Parts per Billion; FEV<sub>1</sub>: Forced Expiratory Volume (1 second); FVC: Forced Vital Capacity; ACQ: Asthma Control Questionnaire; SABA: Short-Acting Beta Agonists

**Table S8: Baseline pre-biologics characteristics of those who meet remission versus those who do not meet remission at annual review (remission criteria ACQ5 <1.5, no mOCS or OCS bursts, FEV<sub>1</sub> above LLN or <100mls less than pre-biologic FEV<sub>1</sub>).**

| Baseline variable                                      | n   | Category                          | Non-remission    | Remission        | p-value |
|--------------------------------------------------------|-----|-----------------------------------|------------------|------------------|---------|
|                                                        | 830 |                                   | 81.7% (678)      | 18.3% (152)      |         |
| Time to first Annual Review (Years)                    | 830 |                                   | 1.1 (1.0,1.4)    | 1.1 (1.0,1.2)    | 0.097   |
| Sex                                                    | 830 | Female                            | 412 (60.8%)      | 77 (50.7%)       | 0.022   |
|                                                        |     | Male                              | 266 (39.2%)      | 75 (49.3%)       |         |
| Age At First Assessment (Years)                        | 830 |                                   | 51.0 (41.0,59.0) | 55.0 (48.0,65.0) | <0.001  |
| Age At First Assessment (Years)                        | 830 | 18-34                             | 111 (16.4%)      | 12 (7.9%)        | 0.005   |
|                                                        |     | 35-54                             | 296 (43.7%)      | 61 (40.1%)       |         |
|                                                        |     | >=55                              | 271 (40.0%)      | 79 (52.0%)       |         |
| Age at Onset of Symptoms (Years)                       | 737 |                                   | 20.0 (6.0,39.0)  | 32.0 (14.0,52.0) | <0.001  |
| Age of Onset of Symptoms (Years)                       | 737 | <12                               | 202 (33.7%)      | 29 (21.2%)       | 0.012   |
|                                                        |     | ≥12 & <18                         | 57 (9.5%)        | 12 (8.8%)        |         |
|                                                        |     | ≥18                               | 341 (56.8%)      | 96 (70.1%)       |         |
| Age Of Onset of Symptoms (Years)                       | 737 | (≥40)                             | 146 (24.3%)      | 63 (46.0%)       | <0.001  |
| Duration Of Symptoms From Baseline (Years)             | 737 |                                   | 24.5 (12.0,37.0) | 20.0 (8.0,32.0)  | 0.008   |
| Ethnicity                                              | 828 | White                             | 583 (86.2%)      | 141 (92.8%)      | 0.028   |
|                                                        |     | Non-White                         | 93 (13.8%)       | 11 (7.2%)        |         |
| Smoking status                                         | 809 | Never                             | 430 (64.9%)      | 109 (74.7%)      | 0.023   |
|                                                        |     | Current/Ex-smoker                 | 233 (35.1%)      | 37 (25.4%)       |         |
| BMI (kg-m2)                                            | 823 |                                   | 30.5 (26.6,35.1) | 27.9 (25.4,31.8) | 0.001   |
| BMI (kg-m2)                                            | 823 | <25                               | 110 (16.4%)      | 34 (22.4%)       | <0.001  |
|                                                        |     | ≥25 & <30                         | 204 (30.4%)      | 67 (44.1%)       |         |
|                                                        |     | ≥30                               | 357 (53.2%)      | 51 (33.6%)       |         |
| Atopic Disease                                         | 830 |                                   | 355 (52.4%)      | 72 (47.4%)       | 0.226   |
| Depression or Anxiety                                  | 830 |                                   | 85 (12.5%)       | 3 (2.0%)         | <0.001  |
| Gastro-oesophageal Reflux                              | 830 |                                   | 119 (17.6%)      | 25 (16.4%)       | 0.745   |
| Nasal polyps                                           | 830 |                                   | 123 (18.1%)      | 48 (31.6%)       | <0.001  |
| OCS bursts (Last Year)                                 | 817 |                                   | 5 (3,8)          | 4 (3,6)          | <0.001  |
| Any OCS bursts (Last Year)                             | 817 |                                   | 624 (93.6%)      | 138 (92.0%)      | 0.493   |
| Frequent Exacerbator at baseline                       | 817 | Yes (≥3 in Last Year)             | 554 (83.1%)      | 114 (76.0%)      | 0.043   |
| Invasive Ventilations (Ever)                           | 798 |                                   | 68 (10.5%)       | 8 (5.4%)         | 0.058   |
| Any ED Attendance for asthma (Last Year)               | 807 |                                   | 259 (39.2%)      | 34 (23.3%)       | <0.001  |
| Any Hospital Admissions for asthma (Last Year)         | 814 |                                   | 270 (40.5%)      | 45 (30.4%)       | 0.022   |
| Highest Blood Eosinophil Count (N/10 <sup>9</sup> L) † | 821 |                                   | 0.68 (0.40,1.00) | 0.79 (0.58,1.33) | <0.001  |
| Highest Blood Eosinophil Count (N/10 <sup>9</sup> L) † | 821 | <0.15                             | 13 (1.9%)        | 4 (2.7%)         | 0.006   |
|                                                        |     | ≥0.15 & <0.3                      | 27 (4.0%)        | 4 (2.7%)         |         |
|                                                        |     | ≥0.3 & <0.5                       | 157 (23.4%)      | 20 (13.3%)       |         |
|                                                        |     | ≥0.5 & <1.0                       | 292 (43.5%)      | 61 (40.7%)       |         |
|                                                        |     | ≥1.0                              | 182 (27.1%)      | 61 (40.7%)       |         |
| Blood Eosinophil Count (N/10 <sup>9</sup> L)           | 819 |                                   | 0.39 (0.18,0.60) | 0.46 (0.22,0.70) | 0.011   |
| FeNO (ppb)                                             | 638 |                                   | 41.0 (22.0,72.0) | 51.0 (35.0,81.0) | 0.002   |
| FeNO (ppb)                                             | 638 | <20                               | 111 (22.0%)      | 12 (9.0%)        | 0.001   |
|                                                        |     | ≥20 & <50                         | 184 (36.5%)      | 50 (37.3%)       |         |
|                                                        |     | ≥50                               | 209 (41.5%)      | 72 (53.7%)       |         |
| Composite Type 2 status                                | 627 | Eos Low (<0.15) / FeNO Low (<20)  | 38 (7.7%)        | 2 (1.5%)         | 0.004   |
|                                                        |     | Eos High (≥0.15) / FeNO Low (<20) | 69 (13.9%)       | 10 (7.6%)        |         |
|                                                        |     | Eos Low (<0.15) / FeNO High (≥20) | 86 (17.3%)       | 21 (16.0%)       |         |
|                                                        |     | Eos High ≥0.15) / FeNO High (≥20) | 303 (61.1%)      | 98 (74.8%)       |         |
| FEV <sub>1</sub> (L)                                   | 818 |                                   | 2.0 (1.5,2.6)    | 2.1 (1.6,2.7)    | 0.073   |
| FEV <sub>1</sub> (% Predicted)                         | 811 |                                   | 67.0 (52.4,81.2) | 68.6 (55.0,88.2) | 0.027   |
| FVC (L)                                                | 802 |                                   | 3.1 (2.5,3.9)    | 3.3 (2.7,4.2)    | 0.048   |
| FVC (% Predicted)                                      | 772 |                                   | 85.2 (73.8,97.0) | 86.7 (75.8,99.4) | 0.065   |



|                                          |     |           |                  |                  |        |
|------------------------------------------|-----|-----------|------------------|------------------|--------|
| FEV <sub>1</sub> /FVC                    | 802 |           | 63.7 (54.3,72.2) | 64.5 (54.4,73.6) | 0.498  |
| ACQ5 Score                               | 736 |           | 3.2 (2.2,4.2)    | 2.0 (1.2,3.4)    | <0.001 |
| Uncontrolled Asthma                      | 711 | ACQ5 ≥1.5 | 531 (88.8%)      | 91 (65.9%)       | <0.001 |
| EuroQoL Health Scale                     | 350 |           | 60.0 (40.0,70.0) | 75.0 (50.0,85.0) | <0.001 |
| EuroQoL Utility                          | 362 |           | 0.7 (0.5,0.8)    | 0.9 (0.8,1.0)    | <0.001 |
| Maintenance OCS                          | 826 |           | 398 (59.1%)      | 77 (50.7%)       | 0.059  |
| Maintenance OCS (mg)*                    | 474 |           | 10 (8,15)        | 10 (7,10)        | 0.001  |
| Inhaled corticosteroids (ICS)            | 830 |           | 676 (99.7%)      | 151 (99.3%)      | 0.500  |
| ICS Dose (BDP equivalent-ug)**           | 775 |           | 2000 (1600,2000) | 2000 (1600,2000) | 0.556  |
| Theophylline                             | 821 |           | 184 (27.3%)      | 32 (21.6%)       | 0.153  |
| SABA                                     | 823 |           | 643 (95.5%)      | 142 (94.7%)      | 0.644  |
| Long-acting β2-agonist (LABA)            | 818 |           | 619 (92.8%)      | 144 (95.4%)      | 0.258  |
| Long acting anti-muscarinic agent (LAMA) | 821 |           | 420 (62.7%)      | 105 (69.5%)      | 0.113  |
| Leukotriene Receptor Antagonists         | 799 |           | 327 (50.1%)      | 80 (54.8%)       | 0.303  |
| Maintenance Macrolides                   | 816 |           | 60 (9.0%)        | 9 (6.0%)         | 0.202  |
| Nebuliser                                | 819 |           | 164 (24.5%)      | 16 (10.7%)       | <0.001 |

\*among patients on oral corticosteroids

\*\*among patients on inhaled corticosteroids

‡ Median (IQR) or count (%) as appropriate; † highest recorded according to prior medical records. 'Last Year' refers to measures assessed using clinical records in the 12 months prior to initial presentation at the severe asthma centre, other measures were as observed or recorded at initial presentation unless otherwise indicated

OR: Odds Ratio; CI: Confidence Interval; BMI: Body Mass Index; ED: Emergency Department; OCS: Oral Corticosteroid Steroids; FeNO: Fractional Exhaled Nitric Oxide; ppb: Parts per Billion; FEV<sub>1</sub>: Forced Expiratory Volume (1 second); FVC: Forced Vital Capacity; ACQ: Asthma Control Questionnaire; SABA: Short-Acting Beta-2 Agonists; ICS: Inhaled Corticosteroid Steroids; LABA: Long-Acting Beta-2 Agonists; LAMA: Long-Acting Muscarinic Antagonist

**Table S9: Odds ratios associated with remission‡ for selected covariates (plus 10 unit increase for age and symptom duration, 1 unit increase in BMI)**

| Variable                                 | Category                             | Unadjusted model |                            | Adjusted for time to first Annual Review, hospital |                            | Adjusted for time to Annual Review, hospital, baseline ACQ5, baseline exacerbations (ie baseline morbidity) |                                |
|------------------------------------------|--------------------------------------|------------------|----------------------------|----------------------------------------------------|----------------------------|-------------------------------------------------------------------------------------------------------------|--------------------------------|
|                                          |                                      | N                | OR (95%CI, p-value)        | N                                                  | OR (95%CI, p-value)        | N                                                                                                           | OR (95%CI, p-value)            |
| OR: Odds Ratio; CI: Confidence           |                                      |                  |                            |                                                    |                            |                                                                                                             |                                |
| Sex                                      | Male                                 | 830              | 1                          | 830                                                | 1                          | 726                                                                                                         | 1                              |
|                                          | Female                               |                  | 0.66 (0.46,0.94), p=0.021  |                                                    | 0.64 (0.45,0.93), p=0.018  |                                                                                                             | 0.76 (0.51,1.15), p=0.199      |
| Age at first assessment (years)          | Increase of 10 years                 | 830              | 1.31 (1.15,1.50), p<0.001  | 830                                                | 1.31 (1.15,1.50), p<0.001  | 726                                                                                                         | 1.25 (1.07,1.45), p=0.004      |
|                                          | 18-34                                | 830              | 1                          | 830                                                | 1                          | 726                                                                                                         | 1                              |
|                                          | 35-54                                |                  | 1.90 (0.99,3.67), p=0.055  |                                                    | 1.94 (0.99,3.80), p=0.053  |                                                                                                             | 1.94 (0.93,4.03), p=0.077      |
| >=55                                     | 2.69 (1.41,5.15), p=0.003            |                  | 2.62 (1.35,5.10), p=0.005  |                                                    | 2.18 (1.05,4.56), p=0.037  |                                                                                                             |                                |
| Duration of symptoms at baseline (years) | Increase of 10 years                 | 737              | 0.86 (0.76,0.97), p=0.011  | 737                                                | 0.86 (0.76,0.97), p=0.013  | 667                                                                                                         | 0.92 (0.81,1.05), p=0.226      |
|                                          | <10                                  | 737              | 1                          | 737                                                | 1                          | 667                                                                                                         | 1                              |
|                                          | 10-19                                |                  | 0.49 (0.27,0.87), p=0.015  |                                                    | 0.54 (0.29,0.97), p=0.040  |                                                                                                             | 0.66 (0.34,1.28), p=0.224      |
|                                          | 20-29                                |                  | 0.61 (0.35,1.05), p=0.073  |                                                    | 0.64 (0.37,1.14), p=0.128  |                                                                                                             | 0.77 (0.41,1.44), p=0.410      |
|                                          | >=30                                 |                  | 0.51 (0.32,0.82), p=0.006  |                                                    | 0.51 (0.31,0.84), p=0.008  |                                                                                                             | 0.70 (0.40,1.22), p=0.210      |
| Ethnicity                                | White                                | 828              | 1                          | 828                                                | 1                          | 724                                                                                                         | 1                              |
|                                          | Non-White                            |                  | 0.51 (0.26,0.98), p=0.043  |                                                    | 0.53 (0.26,1.07), p=0.077  |                                                                                                             | 0.59 (0.26,1.34), p=0.207      |
| BMI (kg-m2)                              | Increase of 1 kg-m2                  | 823              | 0.96 (0.93,0.98), p=0.001  | 823                                                | 0.95 (0.92,0.98), p<0.001  | 722                                                                                                         | 0.96 (0.94,0.99), p=0.016      |
|                                          | Not overweight (<25)                 | 823              | 1                          | 823                                                | 1                          | 722                                                                                                         | 1                              |
|                                          | Overweight (>=25 & <30)              |                  | 1.03 (0.64,1.66), p=0.899  |                                                    | 1.00 (0.61,1.63), p=0.992  |                                                                                                             | 0.98 (0.56,1.71), p=0.945      |
|                                          | Obese (>=30)                         |                  | 0.46 (0.28,0.74), p=0.002  |                                                    | 0.39 (0.24,0.65), p<0.001  |                                                                                                             | 0.53 (0.30,0.93), p=0.026      |
| Smoking status                           | Never smoker                         | 809              | 1                          | 809                                                | 1                          | 710                                                                                                         | 1                              |
|                                          | Current/ex-smoker                    |                  | 0.61 (0.40,0.91), p=0.017  |                                                    | 0.53 (0.34,0.82), p=0.004  |                                                                                                             | 0.64 (0.39,1.03), p=0.066      |
| Depression/anxiety                       | No                                   | 830              | 1                          | 830                                                | 1                          | 726                                                                                                         | 1                              |
|                                          | Yes                                  |                  | 0.13 (0.04,0.42), p=0.001  |                                                    | 0.13 (0.04,0.43), p=0.001  |                                                                                                             | 0.11 (0.02,0.50), p=0.004      |
| Composite Type 2 status                  | Eos Low (<0.15) / FeNO Low (<20)     | 627              | 1                          | 627                                                | 1                          | 556                                                                                                         | 1                              |
|                                          | Eos High (>=0.15) / FeNO Low (<20)   |                  | 2.83 (0.59,13.61), p=0.194 |                                                    | 3.26 (0.67,15.93), p=0.144 |                                                                                                             | 3.79 (0.73,19.75), p=0.113     |
|                                          | Eos Low (<0.15) / FeNO High (>=20)   |                  | 4.61 (1.03,20.66), p=0.046 |                                                    | 5.33 (1.17,24.34), p=0.031 |                                                                                                             | 6.23 (1.28,30.34), p=0.023     |
|                                          | Eos High (>=0.15) / FeNO High (>=20) |                  | 6.34 (1.50,26.78), p=0.012 |                                                    | 7.44 (1.73,31.95), p=0.007 |                                                                                                             | 7.48 (1.64,34.16), p=0.009     |
| OCS bursts (year prior to biologics)     | 0                                    | 817              | 1                          | 817                                                | 1                          | 726                                                                                                         | 1                              |
|                                          | 1                                    |                  | 2.03 (0.81,5.04), p=0.129  |                                                    | 1.54 (0.60,3.94), p=0.363  |                                                                                                             | 1.44 (0.54,3.87), p=0.465      |
|                                          | 2                                    |                  | 0.66 (0.25,1.73), p=0.394  |                                                    | 0.52 (0.19,1.43), p=0.203  |                                                                                                             | 0.57 (0.20,1.65), p=0.302      |
|                                          | >=3                                  |                  | 0.70 (0.35,1.37), p=0.292  |                                                    | 0.50 (0.24,1.06), p=0.070  |                                                                                                             | 0.62 (0.28,1.38), p=0.244      |
| Maintenance OCS                          | No                                   | 826              | 1                          | 826                                                | 1                          | 722                                                                                                         | 1                              |
|                                          | Yes                                  |                  | 0.74 (0.52,1.05), p=0.092  |                                                    | 0.84 (0.57,1.24), p=0.390  |                                                                                                             | 0.83 (0.52,1.30), p=0.408      |
| Biologic Therapy Type                    | Anti-IL5                             | 745              | 1                          | 745                                                | 1                          | 674                                                                                                         | 1                              |
|                                          | Anti-IgE                             |                  | 0.22 (0.09,0.55), p=0.001  |                                                    | 0.25 (0.10,0.64), p=0.004  |                                                                                                             | 0.22 (0.08,0.65), p=0.006      |
| ACQ5                                     | <1.5                                 | 736              | 1                          | 736                                                | 1                          | 726                                                                                                         | 1                              |
|                                          | >=1.5                                |                  | 0.23 (0.15,0.36), p<0.001  |                                                    | 0.19 (0.12,0.31), p<0.001  |                                                                                                             | 0.20 0.20 (0.12,0.32), p<0.001 |

‡ ACQ5 <1.5, no mOCS or OCS bursts, FEV<sub>1</sub> above LLN or <100mls less than pre-biologic FEV<sub>1</sub>

**Figure S2: Estimated adjusted probability of achieving clinical remission\* at the means for selected covariates**

‡ ACQ5 <1.5, and no mOCS or OCS bursts and, FEV<sub>1</sub> above LLN or <100mls less than pre-biologic FEV<sub>1</sub> CI: Confidence Interval; BMI: Body Mass Index; Eos: Blood eosinophil count (N/10<sup>9</sup>L); FeNO: Fractional exhaled Nitric Oxide; OCS: Oral Corticosteroids; mOCS; maintenance OCS; ACQ: Asthma Control Questionnaire; FEV<sub>1</sub>; Forced Expiratory Volume (1 second)

Baseline covariate

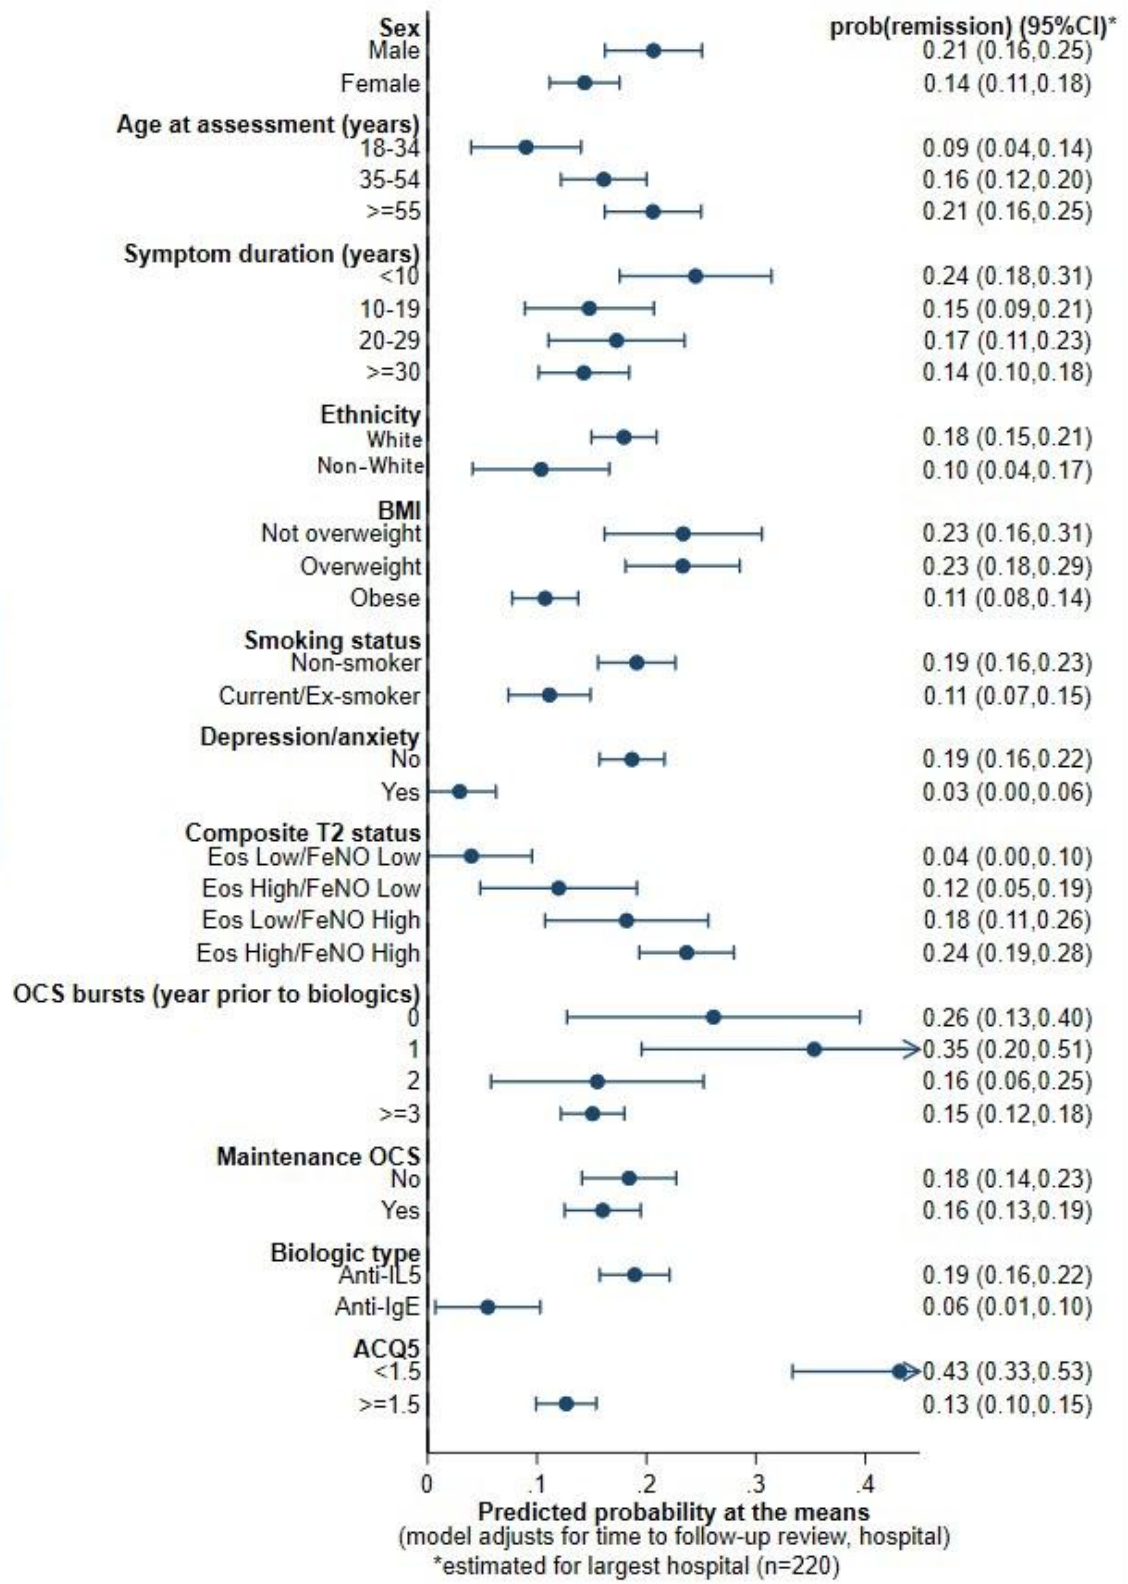

**Table S10: Individual area under the curve for each variable included in the regression model.**

| <b>Variable</b>                          | <b>Individual AUC (95% CI)</b> |
|------------------------------------------|--------------------------------|
| Hospital                                 | 0.618 (0.567,0.669)            |
| Time to Follow-up                        | 0.618 (0.567,0.669)            |
| Age At Initial Assessment (Years)        | 0.655 (0.605,0.706)            |
| Gender                                   | 0.644 (0.591,0.696)            |
| Duration Of Symptoms At Baseline (Years) | 0.661 (0.614,0.709)            |
| Ethnicity                                | 0.627 (0.576,0.677)            |
| BMI (kg-m2)                              | 0.683 (0.636,0.730)            |
| Smoking Status                           | 0.666 (0.617,0.715)            |
| Depression or Anxiety                    | 0.652 (0.604,0.700)            |
| T2-Group                                 | 0.652 (0.600,0.704)            |
| Exacerbations (Last Year)                | 0.657 (0.615,0.700)            |
| Maintenance OCS                          | 0.630 (0.581,0.678)            |
| Biologic Therapy Type                    | 0.651 (0.603,0.700)            |
| Baseline ACQ5                            | 0.709 (0.661,0.756)            |

**Table S11: Remission criteria ACQ <1.5 AND no OCS bursts or mOCS >5mg/day AND FEV<sub>1</sub> above LLN or <5% from pre-biologics FEV<sub>1</sub>: baseline characteristics of those who meet remission at annuak review and those who do not.**

| Baseline variable                                      | n   |                                    | Non-remission    | Remission        | p-value |
|--------------------------------------------------------|-----|------------------------------------|------------------|------------------|---------|
|                                                        | 830 |                                    | 81.7% (678)      | 18.3% (152)      |         |
| Time until Annual Review (Years)                       | 830 |                                    | 1.1 (1.0,1.4)    | 1.1 (1.0,1.2)    | 0.067   |
| Time until Annual Review (Years)                       | 830 | >=9 & <12 months                   | 223 (32.9%)      | 56 (36.8%)       | 0.175   |
|                                                        |     | >=12 & <18 months                  | 349 (51.5%)      | 81 (53.3%)       |         |
|                                                        |     | >=18 & <=24 months                 | 106 (15.6%)      | 15 (9.9%)        |         |
| Sex                                                    | 830 | Female                             | 413 (60.9%)      | 76 (50.0%)       | 0.013   |
| Age At First Assessment (Years)                        | 830 |                                    | 51.0 (41.0,59.0) | 55.0 (48.0,65.0) | <0.001  |
| Age at Onset of Symptoms (Years)                       | 737 |                                    | 20.0 (6.0,39.0)  | 33.5 (14.0,52.0) | <0.001  |
| Age Of Onset of Symptoms (Years)                       | 737 | (≥40 years)                        | 146 (24.3%)      | 63 (46.3%)       | <0.001  |
| Duration Of Symptoms From Baseline (Years)             | 737 |                                    | 25.0 (12.0,37.0) | 20.0 (8.0,31.5)  | 0.007   |
| Duration of Symptoms From Baseline (Years)             | 737 | <20                                | 243 (40.4%)      | 65 (47.8%)       | 0.227   |
|                                                        |     | 20-29                              | 120 (20.0%)      | 27 (19.9%)       |         |
|                                                        |     | >=30                               | 238 (39.6%)      | 44 (32.4%)       |         |
| Ethnicity                                              | 828 | White                              | 583 (86.2%)      | 141 (92.8%)      | 0.028   |
| Smoking status                                         | 809 | Never smoked                       | 430 (64.9%)      | 109 (74.7%)      | 0.023   |
| BMI (kg-m2)                                            | 823 |                                    | 30.5 (26.6,35.2) | 27.8 (25.3,31.6) | <0.001  |
| BMI (kg-m2)                                            | 823 | <25                                | 109 (16.2%)      | 35 (23.0%)       | <0.001  |
|                                                        |     | ≥25 & <30                          | 204 (30.4%)      | 67 (44.1%)       |         |
|                                                        |     | ≥30                                | 358 (53.4%)      | 50 (32.9%)       |         |
| Atopic Disease                                         | 830 |                                    | 355 (52.4%)      | 72 (47.4%)       | 0.226   |
| Depression or Anxiety                                  | 830 |                                    | 85 (12.5%)       | 3 (2.0%)         | <<0.001 |
| Gastro-oesophageal Reflux                              | 830 |                                    | 119 (17.6%)      | 25 (16.4%)       | 0.745   |
| Nasal polyps                                           | 830 |                                    | 124 (18.3%)      | 47 (30.9%)       | 0.001   |
| OCS bursts (Last Year)                                 | 817 |                                    | 5 (3,8)          | 4 (3,6)          | <0.001  |
| Any OCS bursts (Last Year)                             | 817 |                                    | 624 (93.6%)      | 138 (92.0%)      | 0.493   |
| Frequent Exacerbator at baseline                       | 817 | Yes (≥3 in Last Year)              | 554 (83.1%)      | 114 (76.0%)      | 0.043   |
| Invasive Ventilations (Ever)                           | 798 |                                    | 68 (10.5%)       | 8 (5.4%)         | 0.058   |
| Any ED Attendance for asthma (Last Year)               | 807 |                                    | 259 (39.2%)      | 34 (23.3%)       | <0.001  |
| Any Hospital Admissions for asthma (Last Year)         | 814 |                                    | 270 (40.5%)      | 45 (30.4%)       | 0.022   |
| Highest Blood Eosinophil Count (N/10 <sup>9</sup> L) † | 821 |                                    | 0.68 (0.41,1.00) | 0.79 (0.58,1.33) | 0.001   |
| Blood Eosinophil Count (N-109L)                        | 819 |                                    | 0.40 (0.18,0.60) | 0.46 (0.22,0.70) | 0.127   |
| Blood Eosinophil Count (N-109L)                        | 819 | <0.15                              | 148 (22.1%)      | 27 (18.1%)       | 0.102   |
|                                                        |     | ≥0.15 & <0.30                      | 76 (11.3%)       | 20 (13.4%)       |         |
|                                                        |     | ≥0.30 & ≤0.45                      | 169 (25.2%)      | 27 (18.1%)       |         |
|                                                        |     | >0.45                              | 277 (41.3%)      | 75 (50.3%)       |         |
| FeNO (ppb)                                             | 638 |                                    | 41.0 (22.0,72.0) | 51.0 (35.0,81.0) | 0.002   |
| FeNO (ppb)                                             | 638 | <20ppb                             | 111 (22.0%)      | 12 (9.0%)        | 0.001   |
|                                                        |     | ≥20 & <50ppb                       | 185 (36.6%)      | 49 (36.8%)       |         |
|                                                        |     | ≥50ppb                             | 209 (41.4%)      | 72 (54.1%)       |         |
| Composite Type 2 status                                | 627 | Eos Low (<0.15) / FeNO Low (<20)   | 38 (7.6%)        | 2 (1.5%)         | 0.004   |
|                                                        |     | Eos High (≥0.15) / FeNO Low (<20)  | 69 (13.9%)       | 10 (7.7%)        |         |
|                                                        |     | Eos Low (<0.15) / FeNO High (≥20)  | 86 (17.3%)       | 21 (16.2%)       |         |
|                                                        |     | Eos High (≥0.15) / FeNO High (≥20) | 304 (61.2%)      | 97 (74.6%)       |         |
| FEV <sub>1</sub> (L)                                   | 818 |                                    | 2.0 (1.5,2.6)    | 2.1 (1.6,2.7)    | 0.048   |
| FEV <sub>1</sub> (% Predicted)                         | 811 |                                    | 66.9 (52.4,81.2) | 68.6 (55.0,88.2) | 0.024   |
| FVC (L)                                                | 802 |                                    | 3.1 (2.5,3.9)    | 3.3 (2.7,4.2)    | 0.0129  |
| FVC (% Predicted)                                      | 772 |                                    | 85.2 (73.6,97.0) | 86.7 (76.2,99.4) | 0.055   |
| FEV <sub>1</sub> /FVC                                  | 802 |                                    | 63.7 (54.3,72.2) | 64.5 (54.4,72.6) | 0.530   |
| ACQ5 Score                                             | 736 |                                    | 3.2 (2.2,4.2)    | 2.0 (1.2,3.4)    | <0.001  |
| Uncontrolled Asthma                                    | 736 | ACQ5 ≥1.5                          | 532 (89.0%)      | 90 (65.2%)       | <0.001  |
| EuroQoL Health Scale                                   | 350 |                                    | 60.0 (40.0,70.0) | 75.0 (50.0,85.0) | <0.001  |
| EuroQoL Utility                                        | 362 |                                    | 0.7 (0.5,0.8)    | 0.9 (0.8,1.0)    | <0.001  |

|                                                        |     |  |                  |                  |        |
|--------------------------------------------------------|-----|--|------------------|------------------|--------|
| <b>Maintenance OCS</b>                                 | 826 |  | 397 (58.9%)      | 78 (51.3%)       | 0.087  |
| <b>Maintenance OCS (mg) *</b>                          | 474 |  | 10 (8,15)        | 10 (6,10)        | 0.001  |
| <b>Inhaled corticosteroids (ICS)</b>                   | 830 |  | 676 (99.7%)      | 151 (99.3%)      | 0.500  |
| <b>ICS Dose (BDP equivalent-<math>\mu</math>g) **</b>  | 775 |  | 2000 (1600,2000) | 2000 (1600,2000) | 0.619  |
| <b>Theophylline</b>                                    | 821 |  | 184 (27.3%)      | 32 (21.6%)       | 0.153  |
| <b>Short-acting <math>\beta</math>2-agonist (SABA)</b> | 823 |  | 643 (95.5%)      | 142 (94.7%)      | 0.644  |
| <b>Long-acting <math>\beta</math>2-agonist (LABA)</b>  | 818 |  | 620 (93.0%)      | 143 (94.7%)      | 0.439  |
| <b>Long acting anti-muscarinic agent (LAMA)</b>        | 821 |  | 421 (62.8%)      | 104 (68.9%)      | 0.163  |
| <b>Leukotriene Receptor Antagonists</b>                | 799 |  | 328 (50.2%)      | 79 (54.1%)       | 0.397  |
| <b>Maintenance Macrolides</b>                          | 816 |  | 60 (9.0%)        | 9 (6.0%)         | 0.222  |
| <b>Nebuliser</b>                                       | 819 |  | 164 (24.5%)      | 16 (10.7%)       | <0.001 |

\*among patients on oral corticosteroids

\*\*among patients on inhaled corticosteroids

‡ Median (IQR) or count (%) as appropriate; † highest recorded according to prior medical records. 'Last Year' refers to measures assessed using clinical records in the 12 months prior to initial presentation at the severe asthma centre, other measures were as observed or recorded at initial presentation unless otherwise indicated

OR: Odds Ratio; CI: Confidence Interval; BMI: Body Mass Index; ED: Emergency Department; OCS: Oral Corticosteroid Steroids; FeNO: Fractional Exhaled Nitric Oxide; ppb: Parts per Billion; FEV<sub>1</sub>: Forced Expiratory Volume (1 second); FVC: Forced Vital Capacity; ACQ: Asthma Control Questionnaire; SABA: Short-Acting Beta Agonists; ICS: Inhaled Corticosteroid Steroids; LABA: Long-Acting Beta Agonists; LAMA: Long-Acting Muscarinic Antagonist

**Figure S3: Reasons for not meeting remission criteria after 1 year on biologic therapy. Remission definition: ACQ5 <1.5, no mOCS or OCS bursts, FEV<sub>1</sub> above LLN or ≤5% less than pre-biologic FEV<sub>1</sub>**

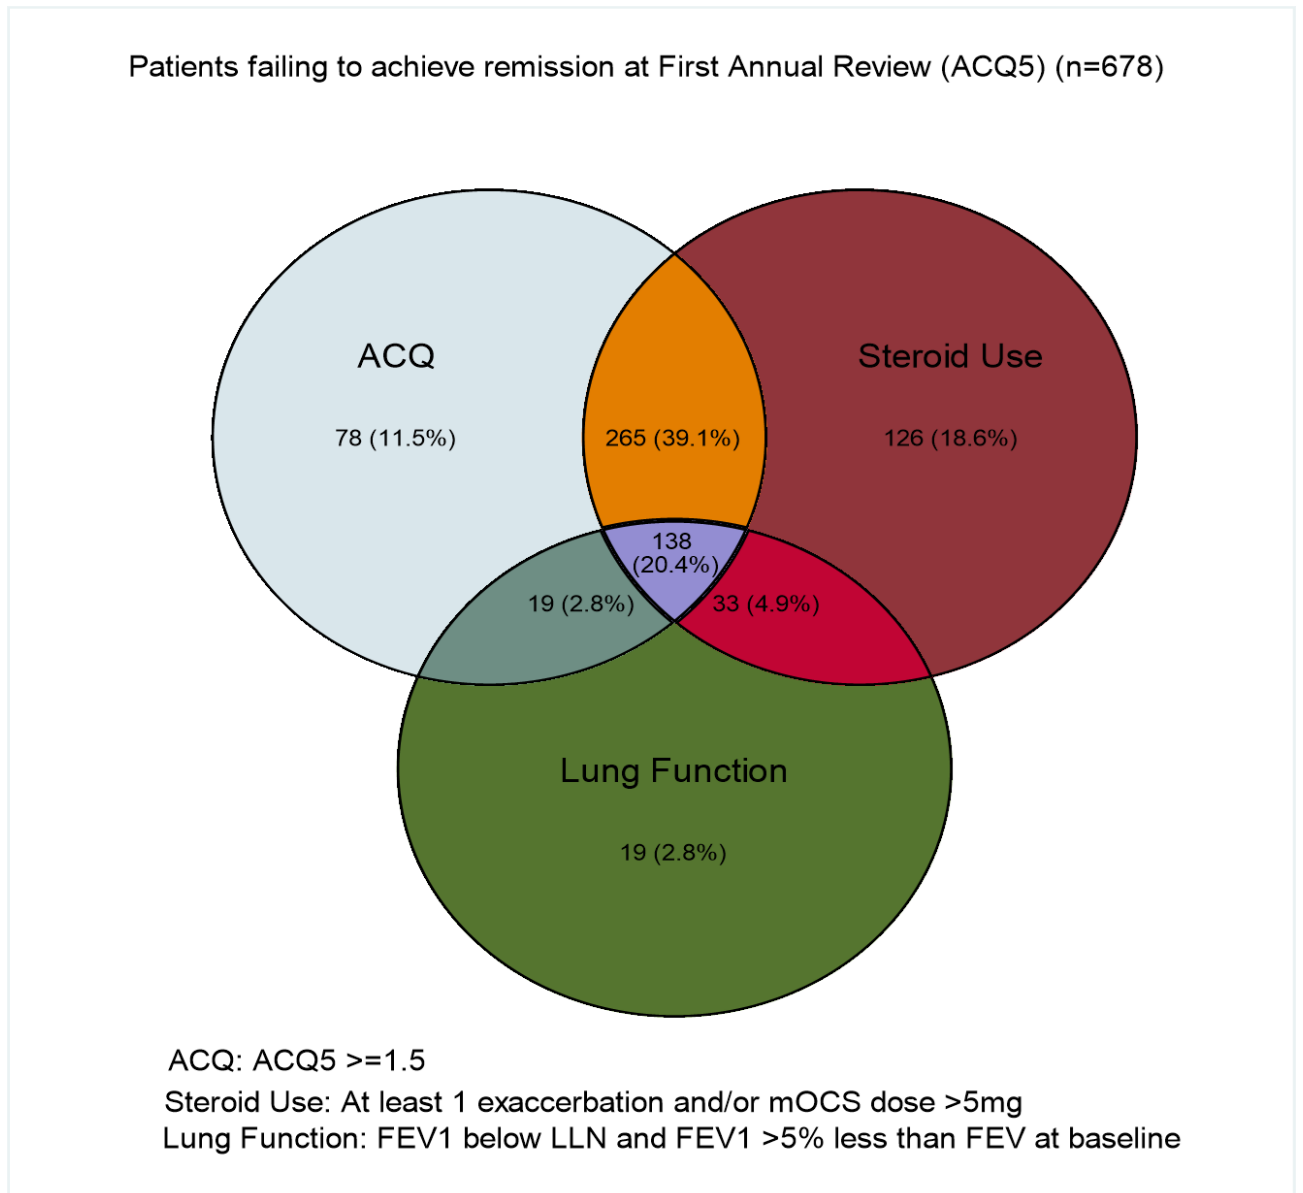

ACQ: Asthma Control Questionnaire; mOCS: maintenance Oral Corticosteroid Steroids; FEV<sub>1</sub>: Forced Expiratory Volume (1 second); LLN: Lower Limit of Normal



**Table S12: Remission criteria ACQ <1.5 AND no OCS bursts or mOCS >5mg/day AND FEV<sub>1</sub> above LLN or no lower than pre-biologics: baseline characteristics of those who meet remission at annual review and those who do not.**

|                                                        | n   | Category                           | Non-remission    | Remission        | p-value |
|--------------------------------------------------------|-----|------------------------------------|------------------|------------------|---------|
|                                                        | 830 |                                    | 82.3% (683)      | 17.7% (147)      |         |
| Time until Annual Review (Years)                       | 830 |                                    | 1.1 (1.0,1.4)    | 1.1 (1.0,1.2)    | 0.054   |
| Time until Annual Review (Years)                       | 830 | >=9 & <12 months                   | 225 (32.9%)      | 54 (36.7%)       | 0.151   |
|                                                        |     | >=12 & <18 months                  | 351 (51.4%)      | 79 (53.7%)       |         |
|                                                        |     | >=18 & <=24 months                 | 107 (15.7%)      | 14 (9.5%)        |         |
| Sex                                                    | 830 | Female                             | 414 (60.6%)      | 75 (51.0%)       | 0.032   |
| Age At First Assessment (Years)                        | 830 |                                    | 51.0 (41.0,59.0) | 55.0 (48.0,65.0) | <0.001  |
| Age at Onset of Symptoms (Years)                       | 737 |                                    | 20.0 (6.0,39.0)  | 33.5 (15.0,52.0) | <0.001  |
| Age Of Onset of Symptoms (≥40 years)                   | 737 |                                    | 148 (24.5%)      | 61 (46.2%)       | <0.001  |
| Duration Of Symptoms From Baseline (Years)             | 737 |                                    | 25.0 (12.0,37.0) | 20.0 (8.0,31.0)  | 0.004   |
| Duration Of Symptoms From Baseline (Years)             | 737 | 0-19                               | 245 (40.5%)      | 63 (47.7%)       | 0.210   |
|                                                        |     | 20-29                              | 120 (19.8%)      | 27 (20.5%)       |         |
|                                                        |     | >=30                               | 240 (39.7%)      | 42 (31.8%)       |         |
| Ethnicity                                              | 828 | White                              | 587 (86.2%)      | 137 (93.2%)      | 0.020   |
| Smoking status                                         | 809 | Never smoked                       | 433 (64.8%)      | 106 (75.2%)      | 0.018   |
| BMI (kg-m2)                                            | 823 |                                    | 30.5 (26.6,35.2) | 27.8 (25.3,31.4) | <0.001  |
| BMI (kg-m2)                                            | 823 | <25                                | 111 (16.4%)      | 33 (22.4%)       | <0.001  |
|                                                        |     | ≥25 & <30                          | 204 (30.2%)      | 67 (45.6%)       |         |
|                                                        |     | ≥30                                | 361 (53.4%)      | 47 (32.0%)       |         |
| Atopic Disease                                         | 830 |                                    | 358 (52.4%)      | 69 (46.9%)       | 0.195   |
| Depression or Anxiety                                  | 830 |                                    | 86 (12.6%)       | 2 (1.4%)         | <0.001  |
| Gastro-oesophageal Reflux                              | 830 |                                    | 120 (17.6%)      | 24 (16.3%)       | 0.718   |
| Nasal polyps                                           | 830 |                                    | 124 (18.2%)      | 47 (32.0%)       | <0.001  |
| OCS bursts (Last Year)                                 | 817 |                                    | 5 (3,8)          | 4 (3,6)          | <0.001  |
| Any OCS bursts (Last Year)                             | 817 |                                    | 629 (93.6%)      | 133 (91.7%)      | 0.413   |
| Frequent Exacerbator at baseline                       | 817 | Yes (≥3 in Last Year)              | 559 (83.2%)      | 109 (75.2%)      | 0.023   |
| Invasive Ventilations (Ever)                           | 798 |                                    | 70 (10.7%)       | 6 (4.2%)         | 0.017   |
| Any ED Attendance for asthma (Last Year)               | 807 |                                    | 261 (39.2%)      | 32 (22.7%)       | <0.001  |
| Any Hospital Admissions for asthma (Last Year)         | 814 |                                    | 272 (40.5%)      | 43 (30.1%)       | 0.020   |
| Highest Blood Eosinophil Count (N/10 <sup>9</sup> L) † | 821 |                                    | 0.69 (0.41,1.00) | 0.79 (0.58,1.33) | <0.001  |
| Blood Eosinophil Count (N/10 <sup>9</sup> L)           | 819 |                                    | 0.39 (0.18,0.60) | 0.47 (0.20,0.70) | 0.086   |
| Blood Eosinophil Count (N/10 <sup>9</sup> L)           | 819 | <0.15                              | 148 (21.9%)      | 27 (18.8%)       | 0.049   |
|                                                        |     | ≥0.15 & <0.30                      | 78 (11.6%)       | 18 (12.5%)       |         |
|                                                        |     | ≥0.30 & ≤0.45                      | 172 (25.5%)      | 24 (16.7%)       |         |
|                                                        |     | >0.45                              | 277 (41.0%)      | 75 (52.1%)       |         |
| FeNO (ppb)                                             | 638 |                                    | 41.0 (22.0,72.0) | 53.0 (36.0,81.0) | <0.001  |
| FeNO (ppb)                                             | 638 | <20ppb                             | 113 (22.2%)      | 10 (7.8%)        | <0.001  |
|                                                        |     | ≥20 & <50ppb                       | 186 (36.5%)      | 48 (37.2%)       |         |
|                                                        |     | ≥50ppb                             | 210 (41.3%)      | 71 (55.0%)       |         |
| Composite Type 2 status                                | 627 | Eos Low (<0.15) / FeNO Low (<20)   | 38 (7.6%)        | 2 (1.6%)         | 0.002   |
|                                                        |     | Eos High (≥0.15) / FeNO Low (<20)  | 71 (14.2%)       | 8 (6.3%)         |         |
|                                                        |     | Eos Low (<0.15) / FeNO High (≥20)  | 86 (17.2%)       | 21 (16.7%)       |         |
|                                                        |     | Eos High (≥0.15) / FeNO High (≥20) | 306 (61.1%)      | 95 (75.4%)       |         |
| FEV <sub>1</sub> (L)                                   | 818 |                                    | 2.0 (1.5,2.6)    | 2.1 (1.6,2.7)    | 0.047   |
| FEV <sub>1</sub> (% Predicted)                         | 811 |                                    | 66.9 (52.4,81.1) | 68.7 (55.0,88.9) | 0.018   |
| FVC (L)                                                | 802 |                                    | 3.1 (2.5,3.9)    | 3.3 (2.7,4.2)    | 0.038   |
| FVC (% Predicted)                                      | 772 |                                    | 85.1 (73.8,97.0) | 87.1 (76.2,99.4) | 0.018   |
| FEV <sub>1</sub> /FVC                                  | 802 |                                    | 63.7 (54.3,72.2) | 64.6 (55.0,73.7) | 0.43    |
| ACQ5 Score                                             | 736 |                                    | 3.2 (2.2,4.2)    | 2.0 (1.2,3.2)    | <0.001  |
| Uncontrolled Asthma                                    | 736 | ACQ5 ≥1.5                          | 536 (88.9%)      | 86 (64.7%)       | <0.001  |
| EuroQoL Health Scale                                   | 350 |                                    | 55.0 (40.0,70.0) | 75.0 (50.0,85.0) | <0.001  |
| EuroQoL Utility                                        | 362 |                                    | 0.7 (0.5,0.8)    | 0.9 (0.8,1.0)    | <0.001  |
| Maintenance OCS                                        | 826 |                                    | 401 (59.1%)      | 74 (50.3%)       | 0.053   |
| Maintenance OCS (mg) *                                 | 474 |                                    | 10 (8,15)        | 10 (7,10)        | 0.004   |

|                                          |     |  |                  |                  |        |
|------------------------------------------|-----|--|------------------|------------------|--------|
| ICS                                      | 830 |  | 681 (99.7%)      | 146 (99.3%)      | 0.478  |
| ICS Dose (BDP equivalent- $\mu$ g) **    | 775 |  | 2000 (1600,2000) | 2000 (1600,2000) | 0.426  |
| Theophylline                             | 821 |  | 185 (27.3%)      | 31 (21.7%)       | 0.166  |
| Short-acting $\beta$ 2-agonist (SABA)    | 823 |  | 648 (95.6%)      | 137 (94.5%)      | 0.569  |
| Long-acting $\beta$ 2-agonist (LABA)     | 818 |  | 624 (92.9%)      | 139 (95.2%)      | 0.304  |
| Long acting anti-muscarinic agent (LAMA) | 821 |  | 423 (62.7%)      | 102 (69.9%)      | 0.101  |
| Leukotriene Receptor Antagonists         | 799 |  | 330 (50.2%)      | 77 (54.6%)       | 0.337  |
| Maintenance Macrolides                   | 816 |  | 61 (9.1%)        | 8 (5.5%)         | 0.154  |
| Nebuliser                                | 819 |  | 166 (24.6%)      | 14 (9.7%)        | <0.001 |

\*among patients on oral corticosteroids\*\*among patients on inhaled corticosteroids<sup>†</sup> Median (IQR) or count (%) as appropriate; † highest recorded according to prior medical records. 'Last Year' refers to measures assessed using clinical records in the 12 months prior to initial presentation at the severe asthma centre, other measures were as observed or recorded at initial presentation unless otherwise indicated.

OR: Odds Ratio; CI: Confidence Interval; BMI: Body Mass Index; ED: Emergency Department; OCS: Oral Corticosteroid Steroids; FeNO: Fractional Exhaled Nitric Oxide; ppb: Parts per Billion; FEV<sub>1</sub>: Forced Expiratory Volume (1 second); FVC: Forced Vital Capacity; ACQ: Asthma Control Questionnaire; SABA: Short-Acting Beta Agonists; ICS: Inhaled Corticosteroid Steroids; LABA: Long-Acting Beta Agonists; LAMA: Long-Acting Muscarinic Antagonist

**Figure S4: Reasons for not meeting remission criteria after 1 year on biologic therapy. Remission definition: ACQ5 <1.5, no mOCS or OCS bursts, FEV<sub>1</sub> above LLN or ≤less than pre-biologic FEV1**

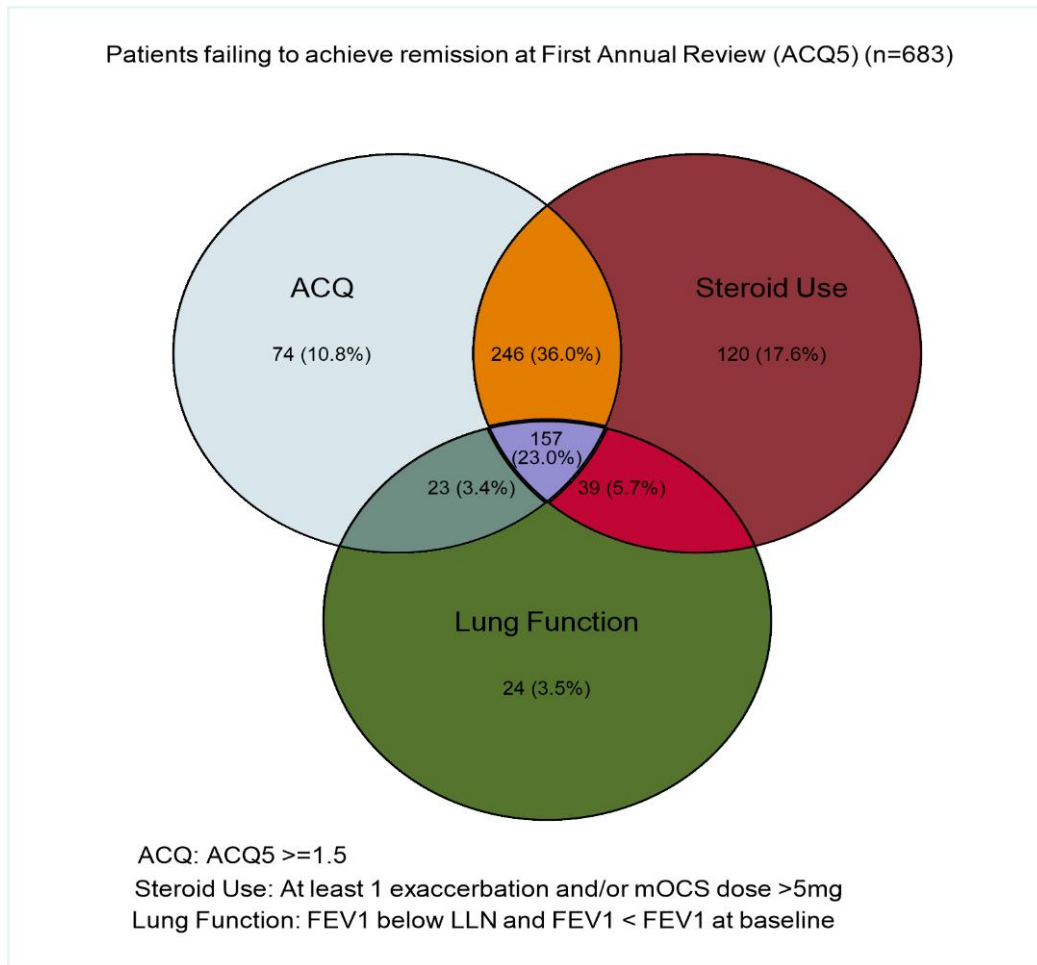

ACQ: Asthma Control Questionnaire; mOCS: maintenance Oral Corticosteroid Steroids; FEV<sub>1</sub>; Forced Expiratory Volume (1 second); LLN: Lower Limit of Normal

**Table S13: Remission criteria ACQ <1.5 AND no OCS bursts or mOCS >5mg/day: baseline characteristics of those who meet remission at 1 year and those who do not**

|                                                        | n   | Category                           | Non-remission    | Remission        | p-value |
|--------------------------------------------------------|-----|------------------------------------|------------------|------------------|---------|
|                                                        | 925 |                                    | 78.8% (729)      | 21.2% (196)      |         |
| Time until Annual Review (Years)                       | 925 |                                    | 1.1 (1.0,1.4)    | 1.1 (1.0,1.3)    | 0.035   |
| Sex                                                    | 925 | Female                             | 445 (61.0%)      | 100 (51.0%)      | 0.011   |
| Age At First Assessment (Years)                        | 925 |                                    | 51.0 (40.0,59.0) | 55.0 (48.0,65.0) | <0.001  |
| Age at Onset of Symptoms (Years)                       | 818 |                                    | 20.0 (6.0,38.5)  | 35.0 (14.0,50.0) | <0.001  |
| Age Of Onset of Symptoms (≥40 years)                   | 818 |                                    | 155 (24.1%)      | 81 (46.6%)       | <0.001  |
| Duration Of Symptoms From Baseline (Years)             | 818 |                                    | 25.0 (12.0,38.0) | 20.0 (8.0,32.0)  | 0.003   |
| Duration of symptoms From Baseline (Years)             | 818 | 0-19                               | 260 (40.4%)      | 80 (46.0%)       | 0.175   |
|                                                        |     | 20-29                              | 123 (19.1%)      | 37 (21.3%)       |         |
|                                                        |     | ≥30                                | 261 (40.5%)      | 57 (32.8%)       |         |
| Ethnicity                                              | 923 | White                              | 623 (85.7%)      | 178 (90.8%)      | 0.060   |
| Smoking status                                         | 903 | Never smoked                       | 460 (64.4%)      | 140 (74.1%)      | 0.012   |
| BMI (kg-m2)                                            | 917 |                                    | 30.7 (26.6,35.2) | 27.8 (24.9,31.8) | <0.001  |
| BMI (kg-m2)                                            | 917 | <25                                | 119 (16.5%)      | 50 (25.6%)       | <0.001  |
|                                                        |     | ≥25 & <30                          | 215 (29.8%)      | 78 (40.0%)       |         |
|                                                        |     | ≥30                                | 388 (53.7%)      | 67 (34.4%)       |         |
| Atopic Disease                                         | 925 |                                    | 382 (52.4%)      | 92 (46.9%)       | 0.166   |
| Depression or Anxiety                                  | 925 |                                    | 100 (13.7%)      | 5 (2.6%)         | <0.001  |
| Gastro-oesophageal Reflux                              | 925 |                                    | 138 (18.9%)      | 34 (17.3%)       | 0.613   |
| Nasal polyps                                           | 925 |                                    | 134 (18.4%)      | 62 (31.6%)       | <0.001  |
| OCS bursts (Last Year)                                 | 908 |                                    | 6 (4,8)          | 4 (3,6)          | <0.001  |
| Any OCS bursts (Last Year)                             | 908 |                                    | 672 (94.1%)      | 178 (91.8%)      | 0.232   |
| Frequent Exacerbator at baseline                       | 908 | Yes (≥3 in Last Year)              | 602 (84.3%)      | 151 (77.8%)      | 0.033   |
| Invasive Ventilations (Ever)                           | 888 |                                    | 76 (10.9%)       | 10 (5.2%)        | 0.019   |
| Any ED Attendance for asthma (Last Year)               | 898 |                                    | 296 (41.7%)      | 50 (26.6%)       | <0.001  |
| Any Hospital Admission for asthma (Last Year)          | 908 |                                    | 299 (41.7%)      | 58 (30.4%)       | 0.004   |
| Highest Blood Eosinophil Count (N/10 <sup>9</sup> L) † | 912 |                                    | 0.68 (0.40,1.00) | 0.79 (0.55,1.33) | <0.001  |
| Blood Eosinophil Count (N/10 <sup>9</sup> L)           | 908 |                                    | 0.40 (0.20,0.60) | 0.46 (0.21,0.72) | 0.082   |
| Blood Eosinophil Count (N/10 <sup>9</sup> L)           | 819 | <0.15                              | 148 (20.7%)      | 37 (19.2%)       | 0.179   |
|                                                        |     | ≥0.15 & <0.30                      | 85 (11.9%)       | 22 (11.4%)       |         |
|                                                        |     | ≥0.30 & ≤0.45                      | 181 (25.3%)      | 37 (19.2%)       |         |
|                                                        |     | >0.45                              | 301 (42.1%)      | 97 (50.3%)       |         |
| FeNO (ppb)                                             | 704 |                                    | 39.0 (22.0,72.0) | 51.0 (33.0,80.0) | 0.001   |
| FeNO (ppb)                                             | 704 | <20ppb                             | 121 (22.5%)      | 19 (11.4%)       | 0.002   |
|                                                        |     | ≥20 & <50ppb                       | 198 (36.9%)      | 59 (35.3%)       |         |
|                                                        |     | ≥50ppb                             | 218 (40.6%)      | 89 (53.3%)       |         |
| Composite Type 2 status                                | 691 | Eos Low (<0.15) / FeNO Low (<20)   | 38 (7.2%)        | 3 (1.8%)         | 0.007   |
|                                                        |     | Eos High (≥0.15) / FeNO Low (<20)  | 79 (15.0%)       | 15 (9.2%)        |         |
|                                                        |     | Eos Low (<0.15) / FeNO High (≥20)  | 84 (15.9%)       | 27 (16.6%)       |         |
|                                                        |     | Eos High (≥0.15) / FeNO High (≥20) | 327 (61.9%)      | 118 (72.4%)      |         |
| FEV <sub>1</sub> (L)                                   | 907 |                                    | 1.9 (1.5,2.6)    | 2.1 (1.5,2.7)    | 0.023   |
| FEV <sub>1</sub> (% Predicted)                         | 899 |                                    | 66.4 (51.6,80.6) | 70.7 (55.6,87.9) | 0.004   |
| FVC (L)                                                | 887 |                                    | 3.1 (2.5,3.9)    | 3.2 (2.7,4.2)    | 0.016   |
| FVC (% Predicted)                                      | 853 |                                    | 84.6 (72.6,96.7) | 86.9 (76.2,99.4) | 0.012   |
| FEV <sub>1</sub> /FVC                                  | 887 |                                    | 63.7 (54.3,71.9) | 64.5 (56.4,73.4) | 0.427   |
| ACQ5 Score                                             | 822 |                                    | 3.4 (2.2,4.2)    | 2.2 (1.2,3.2)    | <0.001  |
| Uncontrolled asthma                                    | 822 | ACQ5 ≥1.5                          | 579 (89.9%)      | 117 (65.7%)      | <0.001  |
| EuroQoL Health Scale                                   | 389 |                                    | 55.0 (40.0,70.0) | 70.0 (50.0,80.0) | <0.001  |
| EuroQoL Utility                                        | 404 |                                    | 0.7 (0.5,0.8)    | 0.9 (0.8,1.0)    | <0.001  |
| Maintenance OCS                                        | 920 |                                    | 422 (58.2%)      | 101 (51.8%)      | 0.109   |
| Maintenance OCS (mg) *                                 | 521 |                                    | 10 (8,15)        | 10 (6,10)        | <0.001  |
| ICS                                                    | 920 |                                    | 422 (58.2%)      | 101 (51.8%)      | 0.109   |
| ICS Dose (BDP equivalent-µg) **                        | 521 |                                    | 2000 (1600,2000) | 2000 (1600,2000) | 0.896   |
| Theophylline                                           | 914 |                                    | 202 (27.9%)      | 38 (20.1%)       | 0.031   |

|                                                        |     |  |             |             |        |
|--------------------------------------------------------|-----|--|-------------|-------------|--------|
| <b>Short-acting <math>\beta</math>2-agonist (SABA)</b> | 918 |  | 693 (95.7%) | 185 (95.4%) | 0.829  |
| <b>Long-acting <math>\beta</math>2-agonist (LABA)</b>  | 912 |  | 668 (93.2%) | 183 (93.8%) | 0.736  |
| <b>Long acting anti-muscarinic agent (LAMA)</b>        | 916 |  | 455 (63.0%) | 125 (64.4%) | 0.717  |
| <b>Leukotriene Receptor Antagonists</b>                | 888 |  | 359 (51.4%) | 98 (51.9%)  | 0.904  |
| <b>Maintenance Macrolides</b>                          | 908 |  | 70 (9.8%)   | 12 (6.2%)   | 0.119  |
| <b>Nebuliser</b>                                       | 913 |  | 179 (24.8%) | 23 (12.0%)  | <0.001 |

\*among patients on oral corticosteroids\*\*among patients on inhaled corticosteroids<sup>†</sup> Median (IQR) or count (%) as appropriate; <sup>†</sup> highest recorded according to prior medical records. 'Last Year' refers to measures assessed using clinical records in the 12 months prior to initial presentation at the severe asthma centre, other measures were as observed or recorded at initial presentation unless otherwise indicated.

OR: Odds Ratio; CI: Confidence Interval; BMI: Body Mass Index; ED: Emergency Department; OCS: Oral Corticosteroid Steroids; FeNO: Fractional Exhaled Nitric Oxide; ppb: Parts per Billion; FEV<sub>1</sub>: Forced Expiratory Volume (1 second); FVC: Forced Vital Capacity; ACQ: Asthma Control Questionnaire; SABA: Short-Acting Beta Agonists; ICS: Inhaled Corticosteroid Steroids; LABA: Long-Acting Beta Agonists; LAMA: Long-Acting Muscarinic Antagonist

**Figure S5: Reasons for not meeting remission criteria after 1 year on biologic therapy. Remission definition: ACQ5 <1.5, no mOCS or OCS bursts**

**Patients failing to achieve remission at First Annual Review (ACQ5) (n=729)**

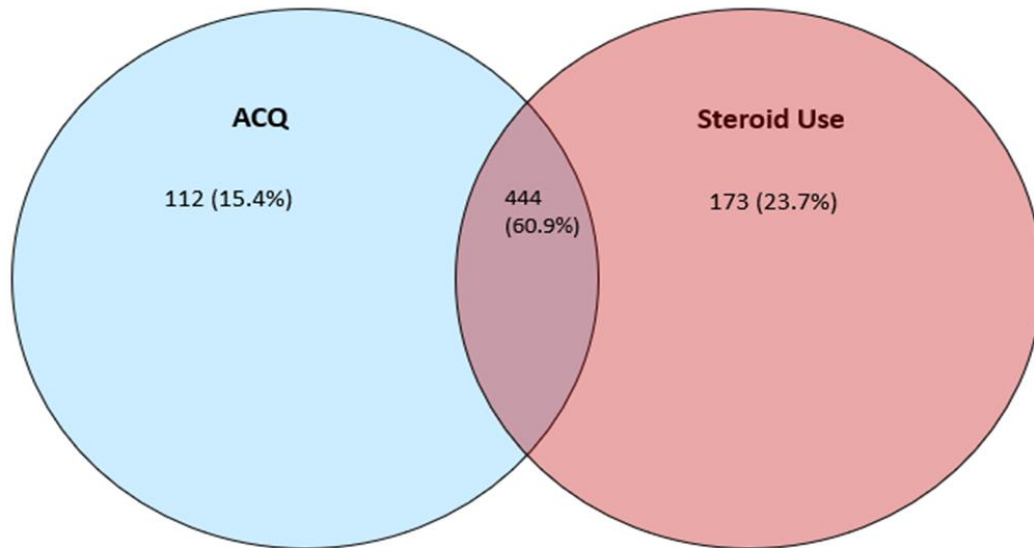

ACQ: ACQ5  $\geq$ 1.5

Steroid Use: At least 1 exacerbation and/or mOCS dose  $>$ 5mg

ACQ: Asthma Control Questionnaire; mOCS: maintenance Oral Corticosteroid Steroids

**Table S14: Remission criteria ACQ <1.5 AND no OCS bursts or mOCS >5mg/day AND no SABA use: baseline characteristics of those who meet remission at annual review and those who do not**

|                                                        | n   | Category                           | Non-remission    | Remission         | p-value |
|--------------------------------------------------------|-----|------------------------------------|------------------|-------------------|---------|
|                                                        | 891 |                                    | 86.2% (768)      | 13.8% (123)       |         |
| Time until Annual Review (Years)                       | 891 |                                    | 1.1 (1.0,1.4)    | 1.1 (1.0,1.3)     | 0.023   |
| Time until Annual Review (Years)                       | 891 | >=9 & <12 months                   | 226 (29.4%)      | 49 (39.4%)        | 0.031   |
|                                                        |     | >=12 & <18 months                  | 409 (53.3%)      | 61 (49.6%)        |         |
|                                                        |     | >=18 & <=24 months                 | 133 (17.3%)      | 13 (10.6%)        |         |
| Sex                                                    | 891 | Female                             | 463 (60.3%)      | 63 (51.2%)        | 0.058   |
| Age At First Assessment (Years)                        | 891 |                                    | 51.0 (41.0,60.0) | 55.0 (48.0,65.0)  | <0.001  |
| Age at Onset of Symptoms (Years)                       | 785 |                                    | 20.0 (6.0,40.0)  | 40.0 (17.0,53.0)  | <0.001  |
| Age Of Onset of Symptoms (≥40 years)                   | 785 |                                    | 171 (25.3%)      | 56 (51.9%)        | <0.001  |
| Duration Of Symptoms From Baseline (Years)             | 785 |                                    | 24.0 (12.0,38.0) | 19.5 (7.5,31.0)   | 0.002   |
| Duration of symptoms From Baseline (Years)             | 785 | 0-19                               | 276 (40.8%)      | 54 (50.0%)        | 0.196   |
|                                                        |     | 20-29                              | 134 (19.8%)      | 18 (16.7%)        |         |
|                                                        |     | >=30                               | 267 (39.4%)      | 36 (33.3%)        |         |
| Ethnicity                                              | 889 | White                              | 657 (85.8%)      | 112 (91.1%)       | 0.111   |
| Smoking status                                         | 869 | Never smoked                       | 485 (64.5%)      | 87 (74.4%)        | 0.036   |
| BMI (kg-m2)                                            | 885 |                                    | 30.5 (26.6,35.2) | 26.7 (24.7,30.5)  | <0.001  |
| BMI (kg-m2)                                            | 885 | <25                                | 133 (17.4%)      | 33 (27.0%)        | <0.001  |
|                                                        |     | ≥25 & <30                          | 227 (29.8%)      | 54 (44.3%)        |         |
|                                                        |     | ≥30                                | 403 (52.8%)      | 35 (28.7%)        |         |
| Atopic Disease                                         | 891 |                                    | 397 (51.7%)      | 58 (47.2%)        | 0.436   |
| Depression or Anxiety                                  | 891 |                                    | 97 (12.6%)       | 1 (0.8%)          | <0.001  |
| Gastro-oesophageal Reflux                              | 891 |                                    | 147 (19.1%)      | 23 (18.7%)        | 0.908   |
| Nasal polyps                                           | 891 |                                    | 147 (19.1%)      | 46 (37.4%)        | <0.001  |
| OCS bursts (Last Year)                                 | 874 |                                    | 6 (3,8)          | 5 (3,6)           | <0.001  |
| Any OCS bursts (Last Year)                             | 874 |                                    | 707 (93.9%)      | 109 (90.1%)       | 0.118   |
| Frequent Exacerbator at baseline                       | 874 | Yes (≥3 in Last Year)              | 631 (83.8%)      | 95 (78.5%)        | 0.150   |
| Invasive Ventilations (Ever)                           | 855 |                                    | 81 (11.0%)       | 3 (2.5%)          | 0.002   |
| Any ED Attendance for asthma (Last Year)               | 864 |                                    | 311 (41.6%)      | 31 (26.5%)        | 0.001   |
| Any Hospital Admission for asthma (Last Year)          | 874 |                                    | 312 (41.3%)      | 35 (29.4%)        | 0.003   |
| Highest Blood Eosinophil Count (N/10 <sup>9</sup> L) † | 878 |                                    | 0.67 (0.40,1.00) | 0.90 (0.55,1.41)  | <0.001  |
| Blood Eosinophil Count (N/10 <sup>9</sup> L)           | 874 |                                    | 0.40 (0.20,0.62) | 0.44 (0.20,0.78)  | 0.410   |
| Blood Eosinophil Count (N/10 <sup>9</sup> L)           | 819 | <0.15                              | 149 (19.8%)      | 26 (21.5%)        | 0.173   |
|                                                        |     | ≥0.15 & <0.30                      | 81 (10.8%)       | 15 (12.4%)        |         |
|                                                        |     | ≥0.30 & ≤0.45                      | 195 (25.9%)      | 20 (16.5%)        |         |
|                                                        |     | >0.45                              | 328 (43.6%)      | 60 (49.6%)        |         |
| FeNO (ppb)                                             | 671 |                                    | 42.0 (23.0,74.0) | 50.0 (35.5,75.5)  | 0.026   |
| FeNO                                                   | 671 | <20ppb                             | 120 (21.2%)      | 11 (10.6%)        | 0.038   |
|                                                        |     | ≥20 & <50ppb                       | 205 (36.2%)      | 40 (38.5%)        |         |
|                                                        |     | ≥50ppb                             | 242 (42.7%)      | 53 (51.0%)        |         |
| Composite Type 2 status                                | 658 | Eos Low (<0.15) / FeNO Low (<20)   | 33 (5.9%)        | 2 (2.0%)          | 0.067   |
|                                                        |     | Eos High (≥0.15) / FeNO Low (<20)  | 83 (14.9%)       | 8 (7.9%)          |         |
|                                                        |     | Eos Low (<0.15) / FeNO High (≥20)  | 87 (15.6%)       | 20 (19.8%)        |         |
|                                                        |     | Eos High (≥0.15) / FeNO High (≥20) | 354 (63.6%)      | 71 (70.3%)        |         |
| FEV <sub>1</sub> (L)                                   | 873 |                                    | 1.9 (1.4,2.6)    | 2.2 (1.7,2.8)     | 0.002   |
| FEV <sub>1</sub> (% Predicted)                         | 865 |                                    | 65.8 (51.4,79.8) | 74.1 (59.1,89.7)  | <0.001  |
| FVC (L)                                                | 853 |                                    | 3.1 (2.5,3.9)    | 3.3 (2.8,4.3)     | 0.007   |
| FVC (% Predicted)                                      | 819 |                                    | 84.3 (72.4,96.7) | 87.8 (79.6,100.6) | 0.004   |
| FEV <sub>1</sub> /FVC                                  | 853 |                                    | 63.5 (53.6,71.7) | 65.9 (58.6,74.4)  | 0.030   |
| ACQ5 Score                                             | 788 |                                    | 3.2 (2.2,4.0)    | 1.8 (0.9,2.8)     | <0.001  |
| Uncontrolled Asthma                                    | 788 | ACQ5 ≥1.5                          | 604 (89.3%)      | 65 (58.0%)        | <0.001  |
| EuroQoL Health Scale                                   | 358 |                                    | 55.0 (40.0,70.0) | 75.0 (50.0,80.0)  | <0.001  |
| EuroQoL Utility                                        | 375 |                                    | 0.7 (0.5,0.8)    | 0.9 (0.8,1.0)     | <0.001  |
| Maintenance OCS                                        | 886 |                                    | 444 (58.1%)      | 59 (48.4%)        | 0.043   |
| Maintenance OCS (mg) *                                 | 501 |                                    | 10 (8,15)        | 10 (6,10)         | <0.001  |
| ICS                                                    | 891 |                                    | 764 (99.5%)      | 122 (99.2%)       | 0.687   |
| ICS Dose (BDP equivalent-µg) **                        | 830 |                                    | 2000 (1600,2000) | 2000 (1600,2000)  | 0.083   |

|                                                        |     |             |             |        |
|--------------------------------------------------------|-----|-------------|-------------|--------|
| <b>Theophylline</b>                                    | 880 | 204 (26.7%) | 21 (17.9%)  | 0.042  |
| <b>Short-acting <math>\beta</math>2-agonist (SABA)</b> | 884 | 729 (95.7%) | 116 (95.1%) | 0.769  |
| <b>Long-acting <math>\beta</math>2-agonist (LABA)</b>  | 878 | 705 (93.3%) | 112 (91.8%) | 0.559  |
| <b>Long acting anti-muscarinic agent (LAMA)</b>        | 882 | 472 (62.1%) | 77 (63.1%)  | 0.831  |
| <b>Leukotriene Receptor Antagonists</b>                | 854 | 369 (50.2%) | 65 (54.6%)  | 0.371  |
| <b>Maintenance Macrolides</b>                          | 875 | 69 (9.2%)   | 6 (5.0%)    | 0.126  |
| <b>Nebuliser</b>                                       | 879 | 173 (22.8%) | 9 (7.5%)    | <0.001 |

\*among patients on oral corticosteroids\*\*among patients on inhaled corticosteroids<sup>†</sup> Median (IQR) or count (%) as appropriate; † highest recorded according to prior medical records. 'Last Year' refers to measures assessed using clinical records in the 12 months prior to initial presentation at the severe asthma centre, other measures were as observed or recorded at initial presentation unless otherwise indicated

OR: Odds Ratio; CI: Confidence Interval; BMI: Body Mass Index; ED: Emergency Department; OCS: Oral Corticosteroid Steroids; FeNO: Fractional Exhaled Nitric Oxide; ppb: Parts per Billion; FEV<sub>1</sub>: Forced Expiratory Volume (1 second); FVC: Forced Vital Capacity; ACQ: Asthma Control Questionnaire; SABA: Short-Acting Beta Agonists; ICS: Inhaled Corticosteroid Steroids; LABA: Long-Acting Beta Agonists; LAMA: Long-Acting Muscarinic Antagonist



**Figure S6: Reasons for not meeting remission criteria after 1 year on biologic therapy. Remission definition: ACQ5 <1.5, no mOCS or OCS bursts, no daily SABA use**

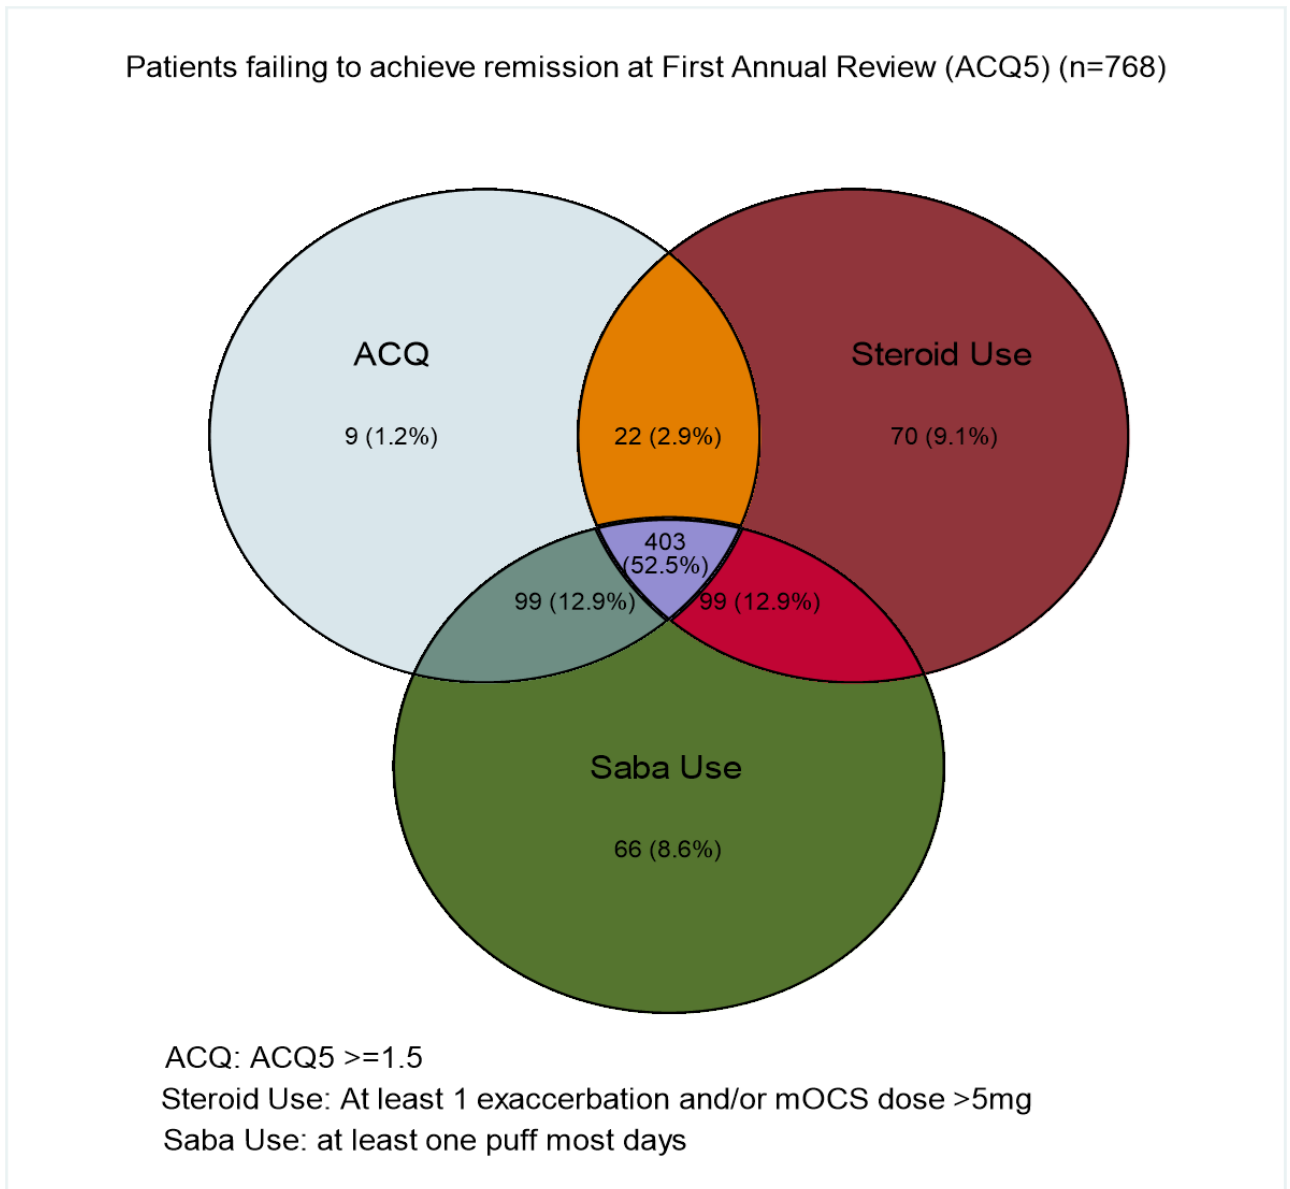

ACQ: Asthma Control Questionnaire; mOCS: maintenance Oral Corticosteroid Steroids; SABA: Short-Acting Beta Agonists

**Table S15: Remission criteria ACQ <1.5 AND no OCS bursts or mOCS >5mg/day AND ≤2 SABA/day: baseline characteristics of those who meet remission at annual review and those who do not.**

|                                                        | n   |                                    | Non-remission    | Remission         | p-value |
|--------------------------------------------------------|-----|------------------------------------|------------------|-------------------|---------|
|                                                        | 891 |                                    | 80.6% (718)      | 19.4% (173)       |         |
| Time until Annual Review (Years)                       | 891 |                                    | 1.1 (1.0,1.4)    | 1.1 (1.0,1.3)     | 0.020   |
| Sex                                                    | 891 | Female                             | 437 (60.9%)      | 89 (51.4%)        | 0.024   |
| Age At First Assessment (Years)                        | 891 |                                    | 51.0 (40.0,59.0) | 56.0 (48.0,65.0)  | <0.001  |
| Age at Onset of Symptoms (Years)                       | 785 |                                    | 20.0 (5.5,39.0)  | 36.0 (16.0,52.0)  | <0.001  |
| Age of Onset of Symptoms (Years)                       | 785 | <12                                | 221 (35.0%)      | 32 (20.9%)        | 0.002   |
|                                                        |     | ≥12 & <18                          | 62 (9.8%)        | 13 (8.5%)         |         |
|                                                        |     | ≥18                                | 349 (55.2%)      | 108 (70.6%)       |         |
| Age Of Onset of Symptoms (≥40 years)                   | 785 |                                    | 153 (24.2%)      | 74 (48.4%)        | <0.001  |
| Duration Of Symptoms From Baseline (Years)             | 785 |                                    | 24.0 (12.0,38.0) | 20.0 (8.0,32.0)   | 0.005   |
| Ethnicity                                              | 889 | White                              | 613 (85.6%)      | 156 (90.2%)       | 0.115   |
| Smoking status                                         | 869 | Never                              | 450 (64.0%)      | 122 (73.5%)       | 0.021   |
| BMI (kg-m2)                                            | 885 |                                    | 30.6 (26.6,35.3) | 27.5 (24.9,30.9)  | <0.001  |
| BMI (kg-m2)                                            | 885 | <25                                | 122 (17.1%)      | 44 (25.6%)        | <0.001  |
|                                                        |     | ≥25 & <30                          | 208 (29.2%)      | 73 (42.4%)        |         |
|                                                        |     | ≥30                                | 383 (53.7%)      | 55 (32.0%)        |         |
| Atopic Disease                                         | 891 |                                    | 377 (52.5%)      | 78 (45.1%)        | 0.080   |
| Depression or Anxiety                                  | 891 |                                    | 95 (13.2%)       | 3 (1.7%)          | <0.001  |
| Gastro-oesophageal Reflux                              | 891 |                                    | 138 (19.2%)      | 32 (18.5%)        | 0.828   |
| Nasal polyps                                           | 891 |                                    | 134 (18.7%)      | 59 (34.1%)        | <0.001  |
| OCS bursts (Last Year)                                 | 874 |                                    | 6 (4,8)          | 4 (3,6)           | <0.001  |
| Any OCS bursts (Last Year)                             | 874 |                                    | 661 (94.0%)      | 155 (90.6%)       | 0.111   |
| Frequent Exacerbator at baseline                       | 874 | Yes (≥3 in Last Year)              | 595 (84.6%)      | 131 (76.6%)       | 0.012   |
| Invasive Ventilations (Ever)                           | 855 |                                    | 77 (11.2%)       | 7 (4.2%)          | 0.006   |
| Any ED Attendance for asthma (Last Year)               | 864 |                                    | 298 (42.6%)      | 44 (26.7%)        | <0.001  |
| Any Hospital Admission for asthma (Last Year)          | 874 |                                    | 300 (42.5%)      | 47 (28.0%)        | <0.001  |
| Highest Blood Eosinophil Count (N/10 <sup>9</sup> L) † | 878 |                                    | 0.67 (0.40,1.00) | 0.79 (0.55,1.33)  | <0.001  |
| Blood Eosinophil Count (N/10 <sup>9</sup> L)           | 874 |                                    | 0.40 (0.20,0.62) | 0.46 (0.20,0.76)  | 0.128   |
| Blood Eosinophil Count (N/10 <sup>9</sup> L)           | 819 | <0.15                              | 140 (19.9%)      | 35 (20.5%)        | 0.155   |
|                                                        |     | ≥0.15 & <0.30                      | 79 (11.2%)       | 17 (9.9%)         |         |
|                                                        |     | ≥0.30 & ≤0.45                      | 183 (26.0%)      | 32 (18.7%)        |         |
|                                                        |     | >0.45                              | 301 (42.8%)      | 87 (50.9%)        |         |
| FeNO (ppb)                                             | 671 |                                    | 41.0 (22.0,72.0) | 51.0 (35.0,81.0)  | 0.002   |
| FeNO (ppb)                                             | 671 | <20ppb                             | 116 (22.1%)      | 15 (10.3%)        | 0.003   |
|                                                        |     | ≥20 & <50ppb                       | 192 (36.6%)      | 53 (36.3%)        |         |
|                                                        |     | ≥50ppb                             | 217 (41.3%)      | 78 (53.4%)        |         |
| Composite Type 2 status                                | 658 | Eos Low (<0.15) / FeNO Low (<20)   | 32 (6.2%)        | 3 (2.1%)          | 0.011   |
|                                                        |     | Eos High (≥0.15) / FeNO Low (<20)  | 80 (15.5%)       | 11 (7.7%)         |         |
|                                                        |     | Eos Low (<0.15) / FeNO High (≥20)  | 81 (15.7%)       | 26 (18.2%)        |         |
|                                                        |     | Eos High (≥0.15) / FeNO High (≥20) | 322 (62.5%)      | 103 (72.0%)       |         |
| FEV <sub>1</sub> (L)                                   | 873 |                                    | 1.9 (1.4,2.6)    | 2.0 (1.6,2.7)     | 0.031   |
| FEV <sub>1</sub> (% Predicted)                         | 865 |                                    | 66.5 (51.5,80.1) | 69.0 (55.6,88.0)  | 0.005   |
| FVC (L)                                                | 853 |                                    | 3.1 (2.5,3.9)    | 3.2 (2.7,4.2)     | 0.035   |
| FVC (% Predicted)                                      | 819 |                                    | 84.6 (72.9,96.7) | 86.8 (75.7,100.0) | 0.029   |
| FEV <sub>1</sub> /FVC                                  | 853 |                                    | 63.7 (54.0,71.8) | 64.4 (56.5,73.4)  | 0.49    |
| ACQ5 Score                                             | 788 |                                    | 3.2 (2.2,4.0)    | 2.2 (1.0,3.2)     | <0.001  |
| Uncontrolled Asthma                                    | 788 | ACQ5 ≥1.5                          | 567 (89.9%)      | 102 (65.0%)       | <0.001  |
| EuroQoL Health Scale                                   | 358 |                                    | 55.0 (40.0,70.0) | 70.0 (50.0,80.0)  | <0.001  |
| EuroQoL Utility                                        | 375 |                                    | 0.7 (0.5,0.8)    | 0.9 (0.8,1.0)     | <0.001  |
| Maintenance OCS                                        | 886 |                                    | 410 (57.4%)      | 93 (54.1%)        | 0.426   |
| Maintenance OCS (mg) *                                 | 501 |                                    | 10 (8,15)        | 10 (6,10)         | <0.001  |
| ICS                                                    | 830 |                                    | 715 (99.6%)      | 171 (98.8%)       | 0.243   |
| ICS Dose (BDP equivalent-µg) **                        | 830 |                                    | 2000 (1600,2000) | 2000 (1600,2000)  | 0.671   |
| Theophylline                                           | 880 |                                    | 191 (26.8%)      | 34 (20.5%)        | 0.095   |
| Short-acting β2-agonist (SABA)                         | 884 |                                    | 682 (95.7%)      | 163 (95.3%)       | 0.850   |
| Long-acting β2-agonist (LABA)                          | 878 |                                    | 657 (93.1%)      | 160 (93.0%)       | 0.987   |

|                                                 |     |  |             |             |        |
|-------------------------------------------------|-----|--|-------------|-------------|--------|
| <b>Long acting anti-muscarinic agent (LAMA)</b> | 882 |  | 439 (61.7%) | 110 (64.3%) | 0.532  |
| <b>Leukotriene Receptor Antagonists</b>         | 854 |  | 348 (50.7%) | 86 (51.5%)  | 0.845  |
| <b>Maintenance Macrolides</b>                   | 875 |  | 67 (9.5%)   | 8 (4.7%)    | 0.043  |
| <b>Nebuliser</b>                                | 879 |  | 167 (23.5%) | 15 (8.9%)   | <0.001 |

\*among patients on oral corticosteroids\*\*among patients on inhaled corticosteroids<sup>‡</sup> Median (IQR) or count (%) as appropriate; † highest recorded according to prior medical records. 'Last Year' refers to measures assessed using clinical records in the 12 months prior to initial presentation at the severe asthma centre, other measures were as observed or recorded at initial presentation unless otherwise indicated

OR: Odds Ratio; CI: Confidence Interval; BMI: Body Mass Index; ED: Emergency Department; OCS: Oral Corticosteroid Steroids; FeNO: Fractional Exhaled Nitric Oxide; ppb: Parts per Billion; FEV<sub>1</sub>: Forced Expiratory Volume (1 second); FVC: Forced Vital Capacity; ACQ: Asthma Control Questionnaire; SABA: Short-Acting Beta Agonists; ICS: Inhaled Corticosteroid Steroids; LABA: Long-Acting Beta Agonists; LAMA: Long-Acting Muscarinic Antagonist

**Figure S7: Reasons for not meeting remission criteria after 1 year on biologic therapy. Remission definition: ACQ5 <1.5, no mOCS or OCS bursts, ≤2 puffs SABA/day**

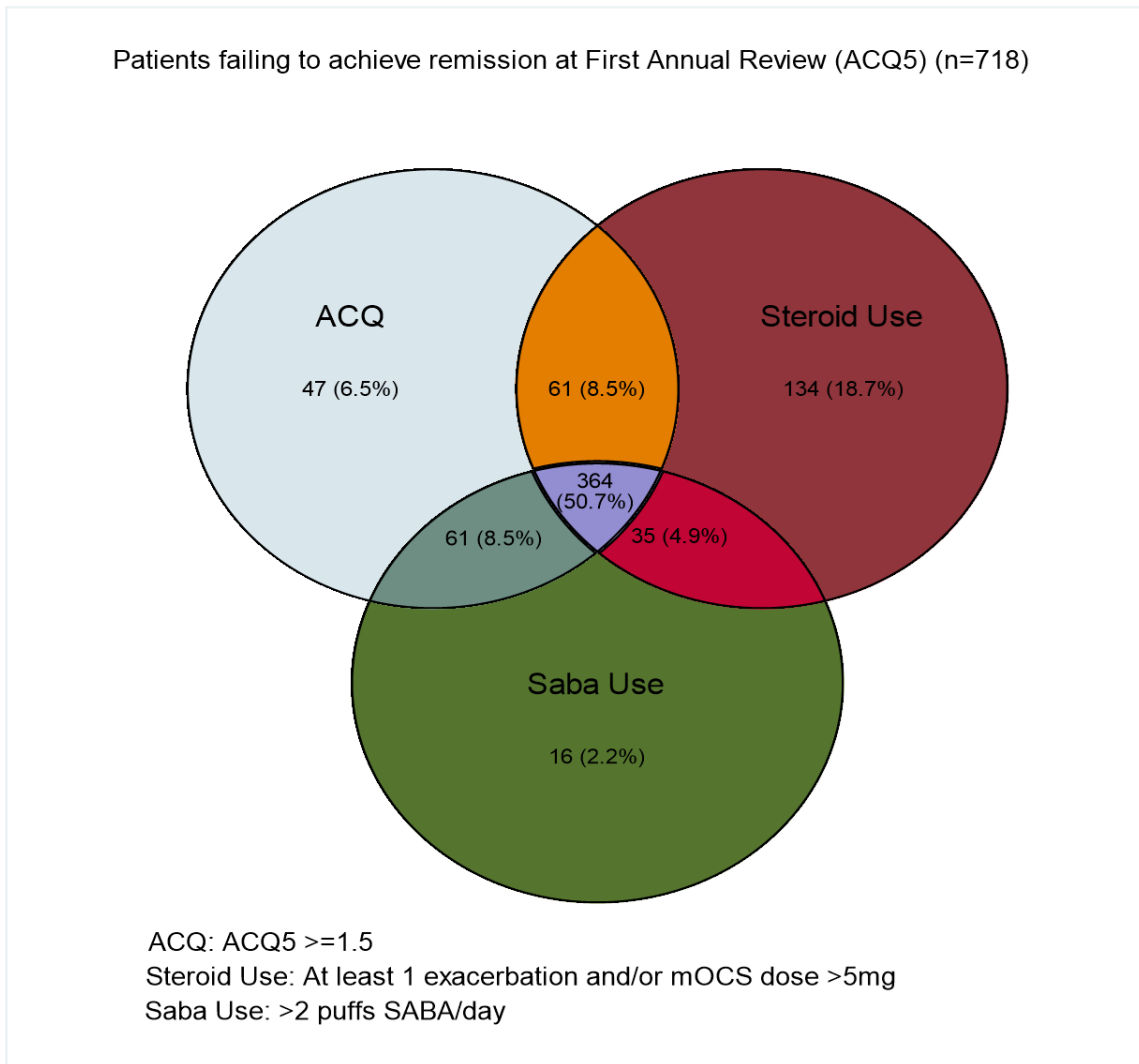

ACQ: Asthma Control Questionnaire; mOCS: maintenance Oral Corticosteroid Steroids; SABA: Short-Acting Beta Agonists

**Table S16: Remission criteria ACQ5  $\leq 0.75$  AND no OCS bursts or mOCS  $>5\text{mg/day}$  AND FEV<sub>1</sub> above LLN or  $<100\text{mls}$  less than pre-biologic FEV<sub>1</sub>: baseline characteristics of those who meet remission at 1 year and those who do not**

|                                                        | n   |                                                    | Non-remission    | Remission         | p-value  |
|--------------------------------------------------------|-----|----------------------------------------------------|------------------|-------------------|----------|
|                                                        | 830 |                                                    | 88.1% (731)      | 11.9 % (99)       |          |
| Time until Annual Review (Years)                       | 830 |                                                    | 1.1 (1.0,1.4)    | 1.1 (1.0,1.2)     | 0.168    |
| Sex                                                    |     | Female                                             | 437 (59.8%)      | 52 (52.5%)        | 0.168    |
| Age At First Assessment (Years)                        | 830 |                                                    | 51.0 (41.0,60)   | 55.0 (47.0,66.0)  | 0.001    |
| Age at Onset of Symptoms (Years)                       | 737 |                                                    | 21.0 (6.0,40.0)  | 31.0 (16.0,52.0)  | $<0.001$ |
| Duration Of Symptoms From Baseline (Years)             | 737 |                                                    | 24.0 (11.0,37.0) | 20.0 (8.0,33.0)   | 0.057    |
| Ethnicity                                              | 828 | White                                              | 629 (86.3%)      | 95 (96.0%)        | 0.006    |
| Smoking status                                         | 809 | Never smoked                                       | 468 (65.5%)      | 71 (74.7%)        | 0.179    |
| BMI (kg-m2)                                            | 823 |                                                    | 30.3 (26.6,35.1) | 27.3 (25.0,31.0)  | $<0.001$ |
| Atopic Disease                                         | 830 |                                                    | 382 (52.3%)      | 45 (45.5%)        | 0.202    |
| Depression or Anxiety                                  | 830 |                                                    | 88 (12.0%)       | 0(0.0%)           | $<0.001$ |
| Gastro-oesophageal Reflux                              | 830 |                                                    | 128 (17.5%)      | 16 (16.2%)        | 0.739    |
| Nasal polyps                                           | 830 |                                                    | 136 (18.6%)      | 35 (35.4%)        | $<0.001$ |
| OCS bursts (Last Year)                                 | 817 |                                                    | 5 (3,8)          | 4 (2,6)           | 0.001    |
| Any OCS bursts (Last Year)                             | 817 |                                                    | 676 (94.0%)      | 86 (87.8%)        | 0.020    |
| Frequent Exacerbator at baseline                       | 817 | Yes ( $\geq 3$ in Last Year)                       | 595 (82.8%)      | 73 (74.5%)        | 0.047    |
| Invasive Ventilations (Ever)                           | 798 |                                                    | 0 (0,0)          | 0 (0,0)           | 0.059    |
| Any ED Attendance for asthma (Last Year)               | 807 |                                                    | 276 (38.8%)      | 17 (17.9%)        | $<0.001$ |
| Any Hospital Admissions for asthma (Last Year)         | 814 |                                                    | 289 (40.3%)      | 26 (26.8%)        | 0.010    |
| Highest Blood Eosinophil Count (N/10 <sup>9</sup> L) † | 821 |                                                    | 0.69 (0.43,1.00) | 0.90 (0.60,1.41)  | $<0.001$ |
| Blood Eosinophil Count (N/10 <sup>9</sup> L)           | 819 |                                                    | 0.39 (0.18,0.60) | 0.53 (0.21,0.78)  | 0.028    |
| Blood Eosinophil Count (N/10 <sup>9</sup> L)           | 819 | $<0.15$                                            | 158 (21.9%)      | 17 (17.5%)        | 0.018    |
|                                                        |     | $\geq 0.15$ & $<0.30$                              | 82 (11.4%)       | 14 (14.4%)        |          |
|                                                        |     | $\geq 0.30$ & $\leq 0.45$                          | 183 (25.3%)      | 13 (13.4%)        |          |
|                                                        |     | $>0.45$                                            | 299 (41.4%)      | 53 (54.6%)        |          |
| FeNO (ppb)                                             | 638 |                                                    | 42.0 (23.0,71.0) | 54.0 (38.0,88.0)  | 0.001    |
| FeNO (ppb)                                             | 638 | $<20\text{ppb}$                                    | 118 (21.4%)      | 5 (5.7%)          | 0.001    |
|                                                        |     | $\geq 20$ & $<50\text{ppb}$                        | 203 (36.8%)      | 31 (35.6%)        |          |
|                                                        |     | $\geq 50\text{ppb}$                                | 230 (41.7%)      | 51 (58.6%)        |          |
| Composite Type 2 status                                | 627 | Eos Low ( $<0.15$ ) / FeNO Low ( $<20$ )           | 40 (7.4%)        | 0(0.0%)           | 0.002    |
|                                                        |     | Eos High ( $\geq 0.15$ ) / FeNO Low ( $<20$ )      | 74 (13.7%)       | 5 (5.9%)          |          |
|                                                        |     | Eos Low ( $<0.15$ ) / FeNO High ( $\geq 20$ )      | 93 (17.2%)       | 14 (16.5%)        |          |
|                                                        |     | Eos High ( $\geq 0.15$ ) / FeNO High ( $\geq 20$ ) | 335 (61.8%)      | 66 (77.6%)        |          |
| FEV <sub>1</sub> (L)                                   | 818 |                                                    | 2.0 (1.4,2.6)    | 2.2 (1.7,2.8)     | 0.001    |
| FEV <sub>1</sub> (% Predicted)                         | 811 |                                                    | 66.5 (52.0,81.1) | 74.1 (61.1,89.9)  | $<0.001$ |
| FVC (L)                                                | 802 |                                                    | 3.1 (2.5,3.9)    | 3.3 (2.8,4.3)     | 0.014    |
| FVC (% Predicted)                                      | 772 |                                                    | 85.1 (73.4,97.1) | 87.2 (79.8,102.9) | 0.011    |
| FEV <sub>1</sub> /FVC                                  | 802 |                                                    | 63.6 (53.6,72.1) | 66.4 (58.1,74.1)  | 0.072    |
| ACQ5 Score                                             | 736 |                                                    | 3.2 (2.2,4.0)    | 1.7 (0.7,3.0)     | $<0.001$ |
| Uncontrolled asthma                                    | 736 | ACQ5 $\geq 1.5$                                    | 569 (88.4%)      | 53 (57.6%)        | $<0.001$ |
| EuroQoL Health Scale                                   | 350 |                                                    | 60.0 (40.0,70.0) | 80.0 (60.0,85.0)  | $<0.001$ |
| EuroQoL Utility                                        | 362 |                                                    | 0.7 (0.5,0.8)    | 0.9 (0.8,1.0)     | $<0.001$ |
| Maintenance OCS                                        | 826 |                                                    | 424 (58.3%)      | 51 (51.5%)        | 0.199    |
| Maintenance OCS (mg) *                                 | 474 |                                                    | 10 (8,15)        | 10 (5,10)         | 0.001    |
| ICS                                                    | 830 |                                                    | 729 (99.7%)      | 98 (99.0%)        | 0.252    |
| ICS Dose (BDP equivalent- $\mu\text{g}$ ) **           | 775 |                                                    | 2000 (1600,2000) | 2000 (1600,2000)  | 0.469    |
| Theophylline                                           | 821 |                                                    | 194 (26.8%)      | 22 (22.9%)        | 0.422    |
| Short-acting $\beta 2$ -agonist (SABA)                 | 823 |                                                    | 694 (95.6%)      | 91 (93.8%)        | 0.433    |
| Long-acting $\beta 2$ -agonist (LABA)                  | 818 |                                                    | 670 (93.1%)      | 93 (94.9%)        | 0.494    |
| Long acting anti-muscarinic agent (LAMA)               | 821 |                                                    | 462 (63.9%)      | 63 (64.3%)        | 0.941    |
| Leukotriene Receptor Antagonists                       | 799 |                                                    | 354 (50.2%)      | 53 (56.4%)        | 0.261    |
| Maintenance Macrolides                                 | 816 |                                                    | 62 (8.6%)        | 7 (7.1%)          | 0.618    |
| Nebuliser                                              | 819 |                                                    | 170 (23.5%)      | 10 (10.4%)        | 0.004    |

\*among patients on oral corticosteroids\*\*among patients on inhaled corticosteroids<sup>†</sup> Median (IQR) or count (%) as appropriate; † highest recorded according to prior medical records. 'Last Year' refers to measures assessed using clinical records in the 12 months prior to initial presentation at the severe asthma centre, other measures were as observed or recorded at initial presentation unless otherwise indicated

OR: Odds Ratio; CI: Confidence Interval; BMI: Body Mass Index; ED: Emergency Department; OCS: Oral Corticosteroid Steroids; FeNO: Fractional Exhaled Nitric Oxide; ppb: Parts per Billion; FEV<sub>1</sub>: Forced Expiratory Volume (1 second); FVC: Forced Vital Capacity; ACQ: Asthma Control Questionnaire; SABA: Short-Acting Beta Agonists; ICS: Inhaled Corticosteroid Steroids; LABA: Long-Acting Beta Agonists; LAMA: Long-Acting Muscarinic Antagonist

**Figure S8: Reasons for not meeting remission criteria after 1 year on biologic therapy. Remission definition: ACQ5  $\leq$ 0.75, no mOCS or OCS bursts, FEV<sub>1</sub> above LLN or <100mls less than pre-biologic FEV<sub>1</sub>**

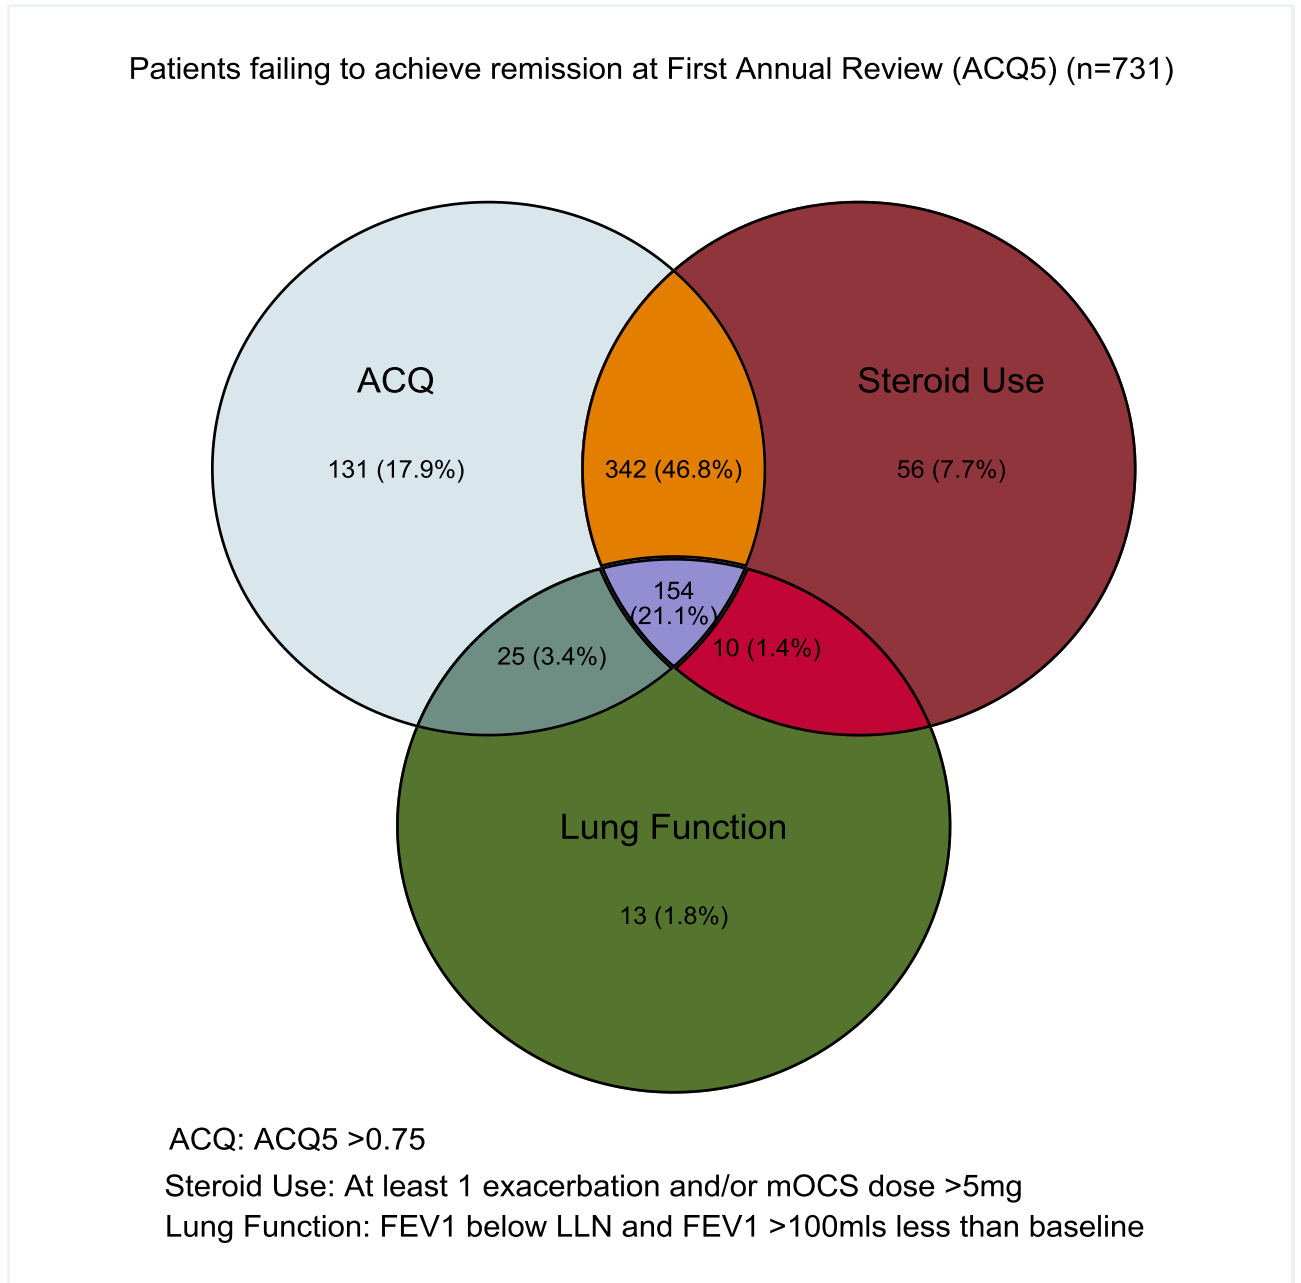

ACQ: Asthma Control Questionnaire; mOCS: maintenance Oral Corticosteroid Steroids; FEV<sub>1</sub>; Forced Expiratory Volume (1 second); LLN: Lower Limit of Normal

### References online supplement:

- E1. Chung FK, Wenzel SE, Brozek JL, Bush A, Castro M, Sterk PJ et al. International ERS/ATS guidelines on definition, evaluation and treatment of severe asthma. *Eur Respir J* 2014; 43: 343–373
- E2. Global initiative for asthma: GINA Difficult to treat and severe asthma, April 2019. URL [GINA-Severe-asthma-Pocket-Guide-v2.0-wms-1.pdf \(ginasthma.org\)](https://ginasthma.org/GINA-Severe-asthma-Pocket-Guide-v2.0-wms-1.pdf) (Accessed 08/08/2023)
- E3. Menzies-Gow A, Bafadhel M, Busse WW, Casale TB, Kocks JWH, Pavord ID, et al. An expert consensus framework for asthma remission as a treatment goal. *Journal of Allergy and Clinical Immunology*. 2020 Mar 1;145(3):757–65.
- E4. National Institute for Health and Care Excellence (NICE), Guidance for Benralizumab, Accessed 21 April 2023, URL: <https://www.nice.org.uk/guidance/TA565/chapter/1-Recommendations>
- E5. National Institute for Health and Care Excellence (NICE), Guidance for Dupilumab, Accessed 21 April 2023, URL: <https://www.nice.org.uk/guidance/TA751/chapter/1-Recommendations>
- E6. National Institute for Health and Care Excellence (NICE), Guidance for Mepolizumab, Accessed 21 April 2023, URL: <https://www.nice.org.uk/guidance/TA671/chapter/1-Recommendations>
- E7. National Institute for Health and Care Excellence (NICE), Guidance for Omalizumab, Accessed 21 April 2023, URL: <https://www.nice.org.uk/guidance/ta278/chapter/1-Guidance>
- E8. National Institute for Health and Care Excellence (NICE), Guidance for Reslizumab, Accessed 21 April 2023, URL: <https://www.nice.org.uk/guidance/TA479/chapter/1-Recommendations>
- E9. Quanjer PH, Stanojevic S, Cole TJ, Baur X, Hall GL, Culver BH, et al. Multi-ethnic reference values for spirometry for the 3-95-yr age range: The global lung function 2012 equations. *European Respiratory Journal*. 2012 Dec 1;40(6):1324–43.
- E10. Juniper EF, O’Byrne PM, Guyatt GH, Ferrie PJ, King DR. Development and validation of a questionnaire to measure asthma control. *Eur Respir J*. 1999;14(4):902–7.
- E11. Juniper EF, Bousquet J, Abetz L, Bateman ED. Identifying “well-controlled” and “not well-



controlled" asthma using the Asthma Control Questionnaire. *Respir Med.* 2006 Apr 1;100(4):616–21.

E12. EuroQol 5 Dimension, 5 level (EQ-5D-5L). Accessed 21 April 2023, URL: <https://euroqol.org/eq-5d-instruments/eq-5d-5l-about/>
